1 **A clonally reproducing generalist aphid pest colonises**  
2 **diverse host plants by rapid transcriptional plasticity of**  
3 **duplicated gene clusters**

4

5 **Thomas C. Mathers<sup>1,2,†</sup>, Yazhou Chen<sup>2,3,†</sup>, Gemy Kaithakottil<sup>1</sup>, Fabrice**  
6 **Legeai<sup>2,4,5</sup>, Sam T. Mugford<sup>2,3</sup>, Patrice Baa-Puyoulet<sup>2,6</sup>, Anthony Bretaudeau<sup>2,4,5</sup>,**  
7 **Bernardo Clavijo<sup>1</sup>, Stefano Colella<sup>2,6</sup>, Olivier Collin<sup>5</sup>, Tamas Dalmay<sup>7</sup>, Thomas**  
8 **Derrien<sup>8</sup>, Honglin Feng<sup>2,9</sup>, Toni Gabaldón<sup>2,10,11,12</sup>, Anna Jordan<sup>3</sup>, Irene**  
9 **Julca<sup>2,10,11</sup>, Graeme J. Kettles<sup>3</sup>, Krissana Kowitwanich<sup>3</sup>, Dominique Lavenier<sup>5</sup>,**  
10 **Paolo Lenzi<sup>3</sup>, Sara Lopez-Gomollon<sup>7</sup>, Damian Loska<sup>2,10,11</sup>, Daniel Mapleson<sup>1</sup>,**  
11 **Florian Maumus<sup>2,13</sup>, Simon Moxon<sup>1</sup>, Daniel R. G. Price<sup>2,9</sup>, Akiko Sugio<sup>3</sup>,**  
12 **Manuella van Munster<sup>2,14</sup>, Marilyne Uzest<sup>2,14</sup>, Darren Waite<sup>1</sup>, Georg Jander<sup>2,15</sup>,**  
13 **Denis Tagu<sup>2,4</sup>, Alex C. C. Wilson<sup>2,9</sup>, Cock van Oosterhout<sup>2,16</sup>, David**  
14 **Swarbreck<sup>1,2,\*</sup> and Saskia A. Hogenhout<sup>2,3,16,\*</sup>**

15

16 <sup>1</sup>Earlham Institute, Norwich Research Park, Norwich, NR4 7UH, United Kingdom;

17 <sup>2</sup>The International Aphid Genomics Consortium; <sup>3</sup>Department of Cell and

18 Developmental Biology, John Innes Centre, Norwich Research Park, Norwich NR4

19 7UH, United Kingdom; <sup>4</sup>INRA, UMR 1349 IGEPP (Institute of Genetics Environment

20 and Plant Protection), Domaine de la Motte, 35657 Le Rheu Cedex, France;

21 <sup>5</sup>IRISA/INRIA, GenOuest Core Facility, Campus de Beaulieu, Rennes, 35042

22 France; <sup>6</sup>Univ Lyon, INSA-Lyon, INRA, BF2I, UMR0203, F-69621 Villeurbanne,

23 France; <sup>7</sup>School of Biological Sciences, University of East Anglia, Norwich Research

24 Park, Norwich NR4 7TJ, UK; <sup>8</sup>CNRS, UMR 6290, Institut de Génétique et  
25 Développement de Rennes, Université de Rennes 1, 2 Avenue du Pr. Léon Bernard,  
26 35000 Rennes, France; <sup>9</sup>Department of Biology, University of Miami, Coral Gables,  
27 FL 33146 USA; <sup>10</sup>Centre for Genomic Regulation (CRG), The Barcelona Institute of  
28 Science and Technology, Dr. Aiguader 88, Barcelona 08003, Spain; <sup>11</sup>Universitat  
29 Pompeu Fabra (UPF), 08003 Barcelona, Spain; <sup>12</sup>Institució Catalana de Recerca i  
30 Estudis Avançats (ICREA), Pg. Lluís Companys 23, 08010 Barcelona, Spain; <sup>13</sup>Unité  
31 de Recherche Génomique-Info (URGI), INRA, Université Paris-Saclay, 78026,  
32 Versailles, France; <sup>14</sup>INRA, UMR BGPI, CIRAD TA-A54K, Campus International de  
33 Baillarguet, 34398 Montpellier Cedex 5, France; <sup>15</sup>Boyce Thompson Institute for  
34 Plant Research, Ithaca, NY 14853, USA; <sup>16</sup>School of Environmental Sciences,  
35 University of East Anglia, Norwich Research Park, Norwich NR4 7TJ, UK.

36

37 † These authors contributed equally to the work

38 \* For correspondence: [saskia.hogenhout@jic.ac.uk](mailto:saskia.hogenhout@jic.ac.uk);

39 [david.swarbreck@earlham.ac.uk](mailto:david.swarbreck@earlham.ac.uk)

40

41 **Current address:**

42 GJK: Rothamsted Research, Harpenden, Hertfordshire, ALF5 2JQ, UK; KK: J. R.

43 Simplot Company, Boise, Idaho, USA; PL: Alson H. Smith Jr. Agriculture and

44 Extension Center, Virginia Tech, Virginia Tech, Winchester 22602, USA; SLG:

45 Department of Plant Sciences, University of Cambridge, Downing Street, Cambridge

46 CB2 3EA, UK; DRGP: Moredun Research Institute, Pentlands Science Park, Bush

47 Loan, Penicuik, Midlothian, EH26 0PZ, UK; AS: INRA, UMR 1349 IGEPP (Institute of

48 Genetics Environment and Plant Protection), Domaine de la Motte, 35657 Le Rheu  
49 Cedex, France.

50

## 51 **Abstract**

### 52 **Background**

53 The prevailing paradigm of host-parasite evolution is that arms races lead to  
54 increasing specialisation via genetic adaptation. Insect herbivores are no exception,  
55 and the majority have evolved to colonise a small number of closely related host  
56 species. Remarkably, the green peach aphid, *Myzus persicae*, colonises plant  
57 species across 40 families and single *M. persicae* clonal lineages can colonise  
58 distantly related plants. This remarkable ability makes *M. persicae* a highly  
59 destructive pest of many important crop species.

### 60 **Results**

61 To investigate the exceptional phenotypic plasticity of *M. persicae*, we sequenced  
62 the *M. persicae* genome and assessed how one clonal lineage responds to host  
63 plant species of different families. We show that genetically identical individuals are  
64 able to colonise distantly related host species through the differential regulation of  
65 genes belonging to aphid-expanded gene families. Multigene clusters collectively up-  
66 regulate in single aphids within two days upon host switch. Furthermore, we  
67 demonstrate the functional significance of this rapid transcriptional change using  
68 RNA interference (RNAi)-mediated knock-down of genes belonging to the cathepsin  
69 B gene family. Knock-down of cathepsin B genes reduced aphid fitness, but only on  
70 the host that induced up-regulation of these genes.

## 71 **Conclusions**

72 Previous research has focused on the role of genetic adaptation of parasites to their  
73 hosts. Here we show that the generalist aphid pest *M. persicae* is able to colonise  
74 diverse host plant species in the absence of genetic specialisation. This is achieved  
75 through rapid transcriptional plasticity of genes that have duplicated during aphid  
76 evolution.

77

## 78 **Key words**

79 Plasticity – Genome sequence – Transcriptome – Gene duplication – RNAi -  
80 Hemiptera – Parasite – Sap-feeding insects

81

## 82 **Background**

83 Parasites often exhibit a high degree of specialisation to a single or reduced  
84 range of host species [1, 2]. This is especially true for insect herbivores, of which  
85 there are around 450 thousand described species living on around 300 thousand  
86 species of vascular plants, the majority of which are monophagous or oligophagous,  
87 being able to colonise only one or a few closely related plant species [3]. Acute  
88 specialisation of parasites is likely due to the complex relationships that occur  
89 between the parasites and their hosts, with increasing specialisation being driven by  
90 coevolutionary arms races [4, 5]. In the case of herbivorous insects, the plant-insect  
91 interface represents a dynamic battle ground between host and parasite in which  
92 insect effector genes evolve to subvert plant defences and plant resistance genes  
93 evolve to detect infection and guide plant immunity [6, 7].

94           Despite the tendency for parasites to evolve highly specialised relationships  
95 with their hosts, occasionally, genuine generalist species with broad host ranges  
96 have evolved. For example, clonally produced individuals of the parasitic trematode  
97 *Maritrema novaezealandensis* are able to colonise a broad range of crustacean  
98 species [8] and the giant round worm *Ascaris lumbricoides*, which causes Ascariasis  
99 and infects an estimated 0.8 billion people worldwide, is able to infect both humans  
100 and pigs [9]. Often, however, generalist parasite species have turned out to be  
101 cryptic specialists, made up of host adapted biotypes or cryptic species complexes  
102 [10-12]. For example, the pea aphid *Acyrtosiphon pisum* is considered  
103 polyphagous, being found on most plants of the Fabaceae, but actually consists of  
104 different biotypes on a continuum of differentiation that colonise specific species of  
105 this plant family [13]. In another example, phylogenetic analysis of Aphidiinae  
106 parasitoid wasps showed that nearly all species previously categorised as  
107 generalists were in fact cryptic, host specialised, species complexes [14]. Even when  
108 the occurrence of true generalist species has been demonstrated, a degree of host  
109 specialisation may be inevitable. In the generalist oomycete plant pathogen *Albugo*  
110 *candida*, host adapted races suppress plant immunity which facilitates colonisation  
111 by non-specialist lineages providing opportunities for gene flow (or genetic  
112 introgression) between host races, enabling host range expansion [15]. As such,  
113 genuine generalists remain rare, and how such parasites manage to keep up in  
114 multilateral coevolutionary arms races remains an evolutionary enigma.

115           The green peach aphid *Myzus persicae* is an extreme example of a genuine  
116 generalist, being able to colonise more than 100 different plant species from 40 plant  
117 families [16]. As in many other aphid species, *M. persicae* has a complex life cycle

118 that consists of both sexual and parthenogenetic (clonal) stages. Sexual  
119 reproduction occurs in autumn on *Prunus* spp. and produces overwintering eggs  
120 from which parthenogenetically reproducing nymphs emerge in the spring [17, 18].  
121 These clonally reproducing individuals soon migrate to an extraordinarily diverse  
122 range of secondary host species, including many agriculturally important crop  
123 species [19]. In areas where *Prunus* spp. are mostly absent, such as in the United  
124 Kingdom, *M. persicae* becomes facultatively asexual, remaining on its secondary  
125 hosts all year round [19]. In both cases, clonal populations of *M. persicae* are found  
126 on diverse plant species. For example, *M. persicae* clone O populations are found on  
127 multiple crop species in the UK and France, including *Brassica* species, potato and  
128 tobacco [20, J. C. Simon, pers. Communication].

129 To investigate the genetic basis of generalism in *M. persicae*, we sequenced  
130 the genomes of two *M. persicae* clones, G006 from the USA and O from the UK and  
131 the transcriptomes of clone O colonies reared on either *Brassica rapa* or *Nicotiana*  
132 *benthamiana*. These two plant species produce different defence compounds shown  
133 to be toxic to insect herbivores [21, 22] presenting distinct challenges to aphid  
134 colonisation. Here we provide evidence that the transcriptional adjustments of co-  
135 regulated and aphid-expanded multiple member gene families underpin the  
136 phenotypic plasticity that enables rapid colonisation of distinct plants by *M. persicae*  
137 clone O.

138

## 139 **Results**

### 140 ***M. persicae* genome sequencing and annotation**

141 To generate a high quality *M. persicae* genome assembly we sequenced a  
142 holocyclic line of the US clone G006 [23] using a combination of Illumina paired end  
143 and mate pair libraries ([Additional File 1: Table S1](#)). The size of the assembled *M.*  
144 *persicae* genome was 347 Mb including ambiguous bases, representing over 82% of  
145 the total genome size as estimated from a kmer analysis of the raw reads (421.6  
146 Mb). The assembly consists of 4,018 scaffolds > 1 kb with an N50 scaffold length of  
147 435 Kb and an average coverage of 51x ([Table 1](#)). A total of 18,529 protein-coding  
148 genes (30,127 isoforms) were predicted using an annotation workflow incorporating  
149 RNA-Seq and protein alignments. We also generated a draft assembly of *M.*  
150 *persicae* clone O, the predominate genotype in the UK [24]. The clone O genome  
151 was independently assembled to a size of 355 Mb with 18,433 protein coding genes  
152 (30,247 isoforms) annotated, validating the genome size and number genes  
153 identified in the G006 assembly ([Table 1](#)). Contiguity of the clone O assembly was  
154 lower than that of G006, with the assembled genome containing 13,407 scaffolds > 1  
155 Kb and having an N50 scaffold length of 164 Kb. Full details of the assembly,  
156 annotation and validation of both genomes are given in [Additional File 2](#).

### 157 **Metabolic pathways are similar in *M. persicae* and *A. pisum***

158 A global analysis of the metabolism enzymes of *M. persicae* was generated  
159 based on the annotated gene models ([Additional File 3](#)) and is available in the  
160 ArthropodaCyc metabolic database collection (<http://arthropodacyc.cycadsys.org/>)  
161 ([Baa-Puyoulet et al., in press](#)). Metabolic reconstruction in *A. pisum* has highlighted  
162 the metabolic complementarity between the aphid and its obligate bacterial  
163 symbiont, *Buchnera aphidicola*, with the symbiont generating essential amino acids

164 for the aphid [25]. We compared the amino acid metabolism pathways identified in  
165 the two clones of *M. persicae* with those previously identified in *A. pisum* [25, 26]. *A.*  
166 *pisum* and the two *M. persicae* gene sets share 170 enzymes belonging to known  
167 amino acid metabolism pathways. *A. pisum* has 22 enzymes that were not found in  
168 either of the two *M. persicae* gene sets, and *M. persicae* has 13 enzymes that were  
169 not found in *A. pisum*. As previously shown in *A. pisum* the *M. persicae* amino acid  
170 metabolism pathways appear complementary with that of *B. aphidicola*. Also, similar  
171 to *A. pisum* and *D. noxia* (manual Blast analyses, data not shown), *M. persicae* lacks  
172 the tyrosine (Tyr) degradation pathway that is present in all insects included in  
173 ArthropodaCyc at the time of writing, indicating that the lack of this pathway may be  
174 common feature of aphids. As such, the ability of *M. persicae* to colonise multiple  
175 plant species is unlikely to involve specific metabolic pathways that are absent in  
176 more specialised aphids.

### 177 **Dynamic gene family evolution in aphids**

178 To investigate gene family evolution in aphids and to understand if specific  
179 gene repertoires may contribute to *M. persicae* ability to have a broad plant host  
180 range, we conducted a comparative analysis of *M. persicae* genes with those of the  
181 specialist aphid *A. pisum*, and 19 other arthropod species. Genes were clustered into  
182 families based on their protein sequence similarity, inferred from an all-vs-all blastp  
183 search, using the Markov Cluster Algorithm (MCL) [27]. Herein, unless otherwise  
184 stated, we use the term 'gene family' to represent clusters generated by MCL.  
185 Phylogenetic relationships amongst the included taxa were inferred using maximum  
186 likelihood (ML) with RAxML [28] based on 66 strict, single copy orthologs found in all



187 species ([Additional File 4: Figure S1](#)). Relative divergence times were then  
188 estimated based on this topology with RelTime [29] ([Figure 1](#)). With the exception of  
189 the placement of *Pediculus humanus*, all phylogenetic relationships received  
190 maximum support and are in agreement with a recently published large-scale  
191 phylogenomic study of insects [30]. Annotation of the *M. persicae* genome reveals a  
192 gene count approximately half that of the specialist aphid *A. pisum*, and similar to  
193 that of other insect species ([Figure 1](#)), implying the massive increase in gene content  
194 observed in *A. pisum* [26] may not be a general feature of aphid species. Using our  
195 comparative dataset, we find that the larger gene count of *A. pisum* compared to *M.*  
196 *persicae* is explained by two features, an increase in lineage specific genes and  
197 widespread duplication of genes from conserved families ([Figure 1](#)). *A. pisum* has  
198 approximately 4 times the number of lineage specific genes than *M. persicae* (8,876  
199 vs. 2,275) and a greater number of genes in families with patchy orthology  
200 relationships across insects (5,628 vs. 7,042 respectively). The higher number of  
201 broadly conserved genes in *A. pisum* is due to widespread gene duplication rather  
202 than differential loss of whole gene families in *M. persicae* with 75% (3,336 / 4,406)  
203 of *A. pisum* gene families that have patchy orthology in arthropods also found in *M.*  
204 *persicae*. Furthermore, the mean size of these families has increased by 82% in *A.*  
205 *pisum* (3.55 vs. 1.95, Mann–Whitney  $U$   $p < 0.00005$ ). This is underlined by the  
206 pattern across all genes, with *A. pisum* having a significantly higher proportion of  
207 multi-copy genes than *M. persicae* (23,577 / 36,193 in *A. pisum* vs. 9,331 / 18,529 in  
208 *M. persicae*, Chi square test:  $\chi^2=1220.61$ , d.f.=1,  $p = 2.02 \times 10^{-267}$ ).

209 In addition to the differences observed between the two aphid species, there  
210 also appears to have been considerable change in gene content during aphid

211 evolution relative to other insect orders. After accounting for evolutionary divergence,  
212 the rate of accumulation of aphid-specific genes is higher than the accumulation of  
213 lineage-specific content in any other insect order (Figure 1). GO term enrichment  
214 analysis of these genes shows they are enriched for biological processes including  
215 detection and response to chemical stimuli, metabolic regulation and regulation of  
216 transcription, processes likely important in aphid evolution and diversification  
217 (Additional File 5: Figure S2 and Additional File 6: Table S2).

218 Modelling of gene gain and loss in widespread gene families across the  
219 arthropod phylogeny also highlights the dynamic pattern of gene family evolution in  
220 aphids (Additional File 7: Figure S3). After correcting for evolutionary distance  
221 between species, *A. pisum* has the highest rate of gene family expansion of any  
222 arthropod species (Additional File 7: Figure S3). *M. persicae* has also undergone a  
223 relatively high number of gene family expansions over a short period of time  
224 compared to other arthropod species, but has significantly fewer expanded gene  
225 families than *A. pisum* (114 / 4983 vs. 538 / 4983; Chi square test:  $\chi^2= 295.03$ ,  
226 d.f.=1,  $p= 3.984 \times 10^{-66}$ ), and overall it has undergone a net decrease in gene family  
227 size. As such, gene gain in *M. persicae* appears to be restricted to a smaller subset  
228 of gene families than in *A. pisum*. This was also confirmed using a more inclusive set  
229 of gene families (6,148 families found in both aphids as well as at least one other  
230 species) with a binomial test to identify significant expansion (173 / 6148 vs. 391 /  
231 6148; Chi square test:  $\chi^2= 88.31$ , d.f.=1,  $p= 5.59 \times 10^{-21}$ ). Interestingly, 85 % of gene  
232 family expansions in *M. persicae* were shared with *A. pisum*. This suggests that a  
233 subset of *M. persicae* gene families may have been selected to retain high ancestral

234 copy number, or have experienced parallel, lineage-specific, duplication, against a  
235 background of reduced expansion genome wide. Full details of all expanded families  
236 are given in ([Additional File 8: Table S3](#)).

### 237 **Genome streamlining in a generalist aphid**

238 Differences in overall gene count and patterns of gene family evolution  
239 between *M. persicae* and *A. pisum* may be the result of a shift in gene duplication  
240 rate, altered selective regimes acting on duplicate retention (i.e. genome  
241 streamlining), or a combination of the two. To test this we conducted a synonymous  
242 ( $d_S$ ) and non-synonymous ( $d_N$ ) substitution rate analysis and found evidence of  
243 increased genome streamlining in the generalist aphid *M. persicae* ([Figure 2A and](#)  
244 [Additional File 9: Figure S4](#)). The age distribution of paralogs in *M. persicae* and *A.*  
245 *pisum* shows that gene duplicates have accumulated steadily in both species with a  
246 continuing high rate of duplication ([Figure 2A](#)). However, we observe marked  
247 differences in the retention rates of ancestrally duplicated genes between the two  
248 species. Using average  $d_S$  between *M. persicae* and *A. pisum* 1:1 orthologs  
249 ( $d_S=0.26$ ) as a cut off to identify ancestral (pre-speciation) duplicates, we find a  
250 significantly greater loss rate in *M. persicae* than *A. pisum*. In *A. pisum*, we found  
251 382 genes that duplicated before speciation, and of those, *M. persicae* has lost one  
252 or both paralogs in 224 families, (59% loss). We detected 285 families that  
253 duplicated before speciation in *M. persicae*, and of those, 69 families lost one or both  
254 paralogs in *A. pisum* (24% loss) (Chi-square test:  $\chi^2=78.55$ , d.f.=1,  $p=7.82 \times 10^{-19}$ ).  
255 Consistent with genome streamlining, we also observe stronger purifying selection in

256 ancestral duplicates retained in *M. persicae* than in *A. pisum* (Figure 2B and  
257 [Additional File 9: Figure S4](#)).

### 258 **A phylome resource for aphids**

259 A phylome resource (the complete collection of gene trees) for *M. persicae* and  
260 all taxa included in the comparative analysis was also generated, and is available for  
261 download or to browse at PhylomeDB [31]. Gene trees were scanned to infer  
262 duplications and speciation events and to derive orthology and paralogy  
263 relationships among homologous genes [32]. Duplication events were assigned to  
264 phylogenetic levels based on a phylostratigraphic approach [33] and duplication  
265 densities calculated on the branches of the species tree leading to *M. persicae*. In  
266 agreement with the comparative analysis above, a high rate of duplication was  
267 observed on the branch leading to *M. persicae* and *A. pisum* and relatively low rate  
268 of duplication observed in *M. persicae* (for full methods and results see [Additional](#)  
269 [File 10](#)).

### 270 **Host transition in *M. persicae* involves transcriptional plasticity of aphid** 271 **specific and aphid expanded genes that constitute gene clusters in the aphid** 272 **genome.**

273 In order to examine how genetically (near) identical *M. persicae* clones are able  
274 to colonize divergent host species, clone O colonies were started from single females  
275 and reared on *Brassica rapa* (Chinese cabbage, Brassicaceae), and subsequently  
276 transferred to *Nicotiana benthamiana* (Solanaceae). The two clonally reproducing  
277 populations were reared in parallel on these plants for one year and their  
278 transcriptomes sequenced. Comparison of these transcriptomes identified 171

279 differentially expressed (DE) genes putatively involved in host adjustment (DEseq, >  
280 1.5 fold change, 10% false discovery rate (FDR); [Figure 3](#); [Additional File 11: Table](#)  
281 [S4](#)).

282 The set of differentially expressed genes was significantly enriched for genes  
283 from multigene families compared to the genome as a whole (126 / 171 DE vs. 9,331  
284 / 18,529 genome wide (GW), Chi square test:  $\chi^2= 36,88$ , d.f.=1,  $p = 6.92 \times 10^{-10}$ ;  
285 [Figure 3A, C](#)). Furthermore, many of the differentially expressed genes are from  
286 aphid expanded or aphid specific gene families (105 / 171 DE vs. 3,585 / 18,529  
287 GW, Chi square test:  $\chi^2= 195.62$ , d.f.=1,  $p = 1.89 \times 10^{-44}$ ; [Figure 3C](#)), highlighting the  
288 important role of aphid genomic novelty in *M. persicae* colonisation of diverse plant  
289 species. In most cases, gene families were uni-directionally regulated with 64  
290 families up-regulated on *B. rapa* and 36 families up-regulated on *N. benthamiana*  
291 ([Additional File 11: Table S4](#)). Genes from only 6 families were bi-directionally  
292 regulated on the plant hosts. Of these, multiple genes of the UDP-  
293 glycosyltransferases, maltase-like, P450 monooxygenases and facilitated trehalose  
294 transporter Tret1-like were up-regulated on *B. rapa* and single genes in each of  
295 these families on *N. benthamiana* ([Additional File 11: Table S4](#)).

296 The cathepsin B and Rebers and Riddiford subgroup 2 (RR-2) cuticular protein  
297 [34] families, which have the highest number genes differentially expressed upon  
298 host transfer ([Figure 3A](#)), typify the way *M. persicae* gene families respond to host  
299 transfer. Members of these families are uni-directionally regulated, with Cathepsin B  
300 genes up-regulated in aphids reared on *B. rapa* and RR-2 cuticular proteins up-

301 regulated in aphids reared on *N. benthamiana*. Further annotation of the cathepsin B  
302 and RR-2 cuticular protein genes (Additional File 3) and phylogenetic analyses of  
303 these genes with other hemipteran species reveals that differentially expressed  
304 genes from these families cluster together in aphid expanded, and in the case of  
305 cathepsin B, *M. persicae* expanded, clades (Figure 4A and Additional File 12: Figure  
306 S5A) for full methods and results see Additional File 10]. We also found that  
307 cathepsin B and RR-2 cuticular proteins regulated in response to host change are  
308 clustered together in the *M. persicae* genome with differentially expressed members  
309 forming tandem arrays within scaffolds (Figure 4B and Additional File 12: Figure  
310 S5B). Differentially expressed UDP-glycosyltransferase, P450 monooxygenases and  
311 lipase-like are also arranged as tandem repeats (Additional Files 13 – 15: Figures S6  
312 – S8), and more generally, tandemly duplicated genes were overrepresented among  
313 the differentially expressed genes (65 / 171 DE vs. 1111 / 18529 GW, Chi-square  
314 test,  $\chi^2=314.66$ , d.f.= 1,  $p = 2.10 \times 10^{-70}$ ; Figure 3B) highlighting the tendency of  
315 genes regulated in response to host change to be clustered in the *M. persicae*  
316 genome.

317 In many parasites recent, lineage-specific, gene family expansions have been  
318 implicated in host range expansion and transitions to generalism, for example in the  
319 nematode genus *Strongyloides* [35] and the ascomycete genus *Metarhizium* [36].  
320 We therefore tested for the presence of recently duplicated genes involved in *M.*  
321 *persicae* host colonisation (differentially expressed on host transfer) by estimating  
322 the coalescence times of these genes and comparing them to the aphid phylogeny.  
323 Contrary to our expectations, the analysis of pairwise substitution patterns between  
324 duplicated differentially expressed genes and their closest paralog show that these

325 genes are older than the genome wide average, with the differentially expressed  
326 gene set enriched for gene duplicates that arose before the divergence of *M.*  
327 *persicae* and *A. pisum* (paralog pairs  $d_S$  0.26 – 2.00: DE duplicated = 75 / 97, whole  
328 genome = 1,348 / 2,414, Chi square test:  $\chi^2 = 15.87$ , d.f.=1,  $p = 6.79 \times 10^{-5}$ ) (Figure  
329 3D). In addition, we found that host regulated genes appear to be under stronger  
330 purifying selection than the genome wide average with paralog pairs containing at  
331 least 1 differentially expressed gene having median  $d_N/d_S$  significantly lower than for  
332 all paralog pairs in the genome (median  $d_N/d_S = 0.2618$  vs. 0.3338, Mann–  
333 Whitney  $U = 105,470$ ,  $p = 1.47 \times 10^{-4}$ ) (Figure 3E, Additional File 16: Table S5). This  
334 suggests that most of the genetic variation utilised during host colonisation was  
335 present in the common ancestor of the two aphid species, and hence *Myzus* specific  
336 gene duplication alone does not represent the evolutionary innovation that enables a  
337 generalist lifestyle. Rather, generalism could be facilitated by the plastic expression  
338 of predominantly pre-existing genetic variation - in this instance, aphid specific gene  
339 duplicates.

#### 340 **Gene expression changes upon host transfer occur rapidly**

341 To further investigate gene expression plasticity in *M. persicae* upon transfer to  
342 diverged hosts, we investigated differential gene expression of aphids transferred  
343 from *B. rapa* to *N. benthamiana* and allowed adjustment on their new hosts for 7  
344 weeks, this time also including a transfer from *B. rapa* to *Arabidopsis thaliana*. *M.*  
345 *persicae* clone O successfully colonised all three host species with no significant  
346 differences observed between development time, reproduction rate, longevity or  
347 weight (Additional File 17: Figure S8.5). We used cathepsin B and RR-2 cuticular

348 proteins identified as differentially expressed by RNA-Seq as marker genes and  
349 measured their expression by qRT-PCR. All differentially expressed cathepsin B and  
350 RR-2 cuticular protein genes for which specific primers could be designed (the  
351 majority) found to be differentially expressed in the RNA-Seq experiments were also  
352 differentially expressed in the qRT-PCR experiments. Furthermore, we find similar  
353 expression patterns for aphids reared on Brassicaceae species with cathepsin B  
354 copies up-regulated on *B. rapa* and *A. thaliana* relative to *N. benthamiana* (Figure  
355 4C) and RR-2 cuticular proteins down-regulated (Additional File 12: Figure S5C).

356 To investigate how fast gene expression changes upon host transfer, individual  
357 aphids (3-day old nymphs) were transferred from *A. thaliana* to *N. benthamiana* and  
358 vice versa, or to the same host, and expression of cathepsin B and RR-2 cuticular  
359 protein genes measured after two days by qRT-PCR. Cathepsin B gene expression  
360 went up in aphids transferred from *N. benthamiana* to *A. thaliana* and down in aphids  
361 transferred from *A. thaliana* to *N. benthamiana* (Figure 4D,E). Conversely,  
362 expression of RR-2 cuticular protein genes went down in aphids transferred from *N.*  
363 *benthamiana* to *A. thaliana* and up in aphids transferred from *A. thaliana* to *N.*  
364 *benthamiana* (Additional File 12: Figure S5D,E). No significant change was observed  
365 when aphids were transferred to the same plant species (from *A. thaliana* to *A.*  
366 *thaliana*, or *N. benthamiana* to *N. benthamiana*). Hence, expression levels of  
367 cathepsin B and RR-2 cuticular protein genes adjust quickly upon host change  
368 (within 2 days) and regulated in a coherent, host dependent, fashion.

369 **Cathepsin B contribute to *M. persicae* fitness in a plant host dependent**  
370 **manner**



371 To test whether targets of transcriptional plasticity in *M. persicae* have direct  
372 fitness effects we conducted plant-mediated RNAi knockdown [37, 38] of cathepsin B  
373 genes identified as differentially expressed upon host transfer. We focused on  
374 cathepsin B as the majority (11 out of 12) of gene copies differentially expressed  
375 upon host transfer are located in a single, *M. persicae* expanded clade (Cath\_Clade  
376 I) of the cathepsin B phylogeny (Figure 4A) and have 69-99% nucleotide sequence  
377 identities to one-another (Additional File 18). As such, a single dsRNA construct can  
378 be used to knock down multiple cathepsin B genes. In contrast, the clade containing  
379 the majority of differentially regulated RR-2 cuticular protein genes is larger and  
380 more diverse (Additional File 12: Figure S5), presenting a challenge for using the  
381 RNAi-mediated approach to examine how these genes act together to enable *M.*  
382 *persicae* colonisation. Three independent stable transgenic *A. thaliana* lines  
383 producing dsRNAs targeting multiple cathepsin B genes (At\_dsCathB 5-1, 17-5 and  
384 18-2; Additional File 18) were generated. The expression levels of all Cath\_Clade I  
385 genes except MpCath12 were down-regulated in *M. persicae* reared on these lines  
386 (Figure 5A) in agreement with MpCath12 having the lowest identity to the dsRNA  
387 sequence (73% vs > 77% for other copies) (Additional File 18). Aphids on the three  
388 At\_dsCathB lines produced about 25% fewer progeny ( $p < 0.05$ ) compared to those  
389 reared on the At\_dsGFP control plants (Figure 5B) indicating that the cathepsin B  
390 genes contribute to *M. persicae* ability to colonise *A. thaliana*.

391 To examine the impact of cathepsin B on the ability of *M. persicae* to adjust to  
392 host change, the cathB-RNAi aphids were transferred from At\_dsCathB lines to non-  
393 transgenic *A. thaliana* and *N. benthamiana* plants and examined for survival and  
394 fecundity. In agreement with previous data [38], we found that the genes targeted by

395 RNAi remain down regulated at 2 days upon transfer from At\_dsCathB lines to non-  
396 transgenic plants (Additional File 19: Figure S9). Upon transfer to *A. thaliana*, the  
397 cathB-RNAi aphids had lower survival and reproduction rates than the dsGFP-  
398 exposed (control) aphids (Figure 5C,E). In contrast, no decline in survival and  
399 reproduction was seen of the cathB-RNAi aphids compared to the dsGFP-exposed  
400 aphids upon transfer to *N. benthamiana* (Figure 5D,F). Thus, cathB knock down  
401 impacts *M. persicae* fitness differentially depending on the host plant species.  
402 Together these data provide evidence that adjustment of the cathepsin B gene  
403 expression levels between *A. thaliana* and *N. benthamiana* contributes to the ability  
404 of *M. persicae* to colonise both plant species.

## 405 Discussion

406 So far, genomic studies of polyphagy and generalism have primarily focused on  
407 genetic adaptation and have led to the identification of specific genetic elements that  
408 are present in the genomes of one race (or biotype) versus another and that enable  
409 these races to be host-specific [13, 15, 26]. In such cases, whilst the species as a  
410 whole may be considered polyphagous, individuals are not. Here, we have  
411 investigated the genome and transcriptome of the genuine generalist *Myzus*  
412 *persicae*. We demonstrate the striking ability of *M. persicae* to colonise divergent  
413 host plant species by conducting host transfer experiments using individuals from a  
414 single, clonally reproducing line (Clone O), and allowing them to adjust to three  
415 distinct host plant species from two plant families. We show that generalism in *M.*  
416 *persicae* is associated with rapid transcriptional plasticity of often aphid-specific gene  
417 copies from multi-gene families that are uni-directionally regulated. Furthermore, we  
418 show that disrupting the transcriptional adjustment of a gene family with high levels

419 of differentially expressed upon host transfer (cathepsin B), using plant mediated  
420 RNAi, has host dependent fitness costs for *M. persicae*, suggesting that host  
421 associated transcriptional plasticity is adaptive in *M. persicae*.

422         Contrary to expectations, the majority of genes differentially regulated upon  
423 host transfer originate from ancestral aphid duplication events rather than more  
424 recent lineage-specific duplications. Additionally, comparative analysis of all *M.*  
425 *persicae* gene families with other arthropods showed that, whilst gene family  
426 evolution appears to have been highly dynamic during aphid diversification, *M.*  
427 *persicae* does not exhibit widespread gene duplication on the scale of the legume  
428 specialist *A. pisum*. This is surprising given that other studies have shown a key role  
429 for lineage-specific gene duplication in parasite host range expansions [35, 36].  
430 Although not extensive, recent gene duplication may still play a role in *M. persicae*  
431 host adaptation given that some gene families have undergone *M. persicae* specific  
432 gene duplication against a background of reduced gene family expansion genome  
433 wide. For example, the cathepsin B and UGT gene families have undergone *M.*  
434 *persicae* specific gene duplication and are implicated in host adjustment. These  
435 observations are consistent with genome streamlining in *M. persicae*, with  
436 functionally important gene duplicates preferentially retained. It therefore seems  
437 likely that functionally important lineage-specific gene duplication combined with  
438 rapid transcriptional plasticity of a broader, aphid-specific gene repertoire, consisting  
439 of selectively retained gene duplicates, underpins the generalist feeding habit in *M.*  
440 *persicae*.

441           Transcriptional plasticity has also been implicated in host adjustment in  
442 generalist spider mite and butterfly species [39, 40]. This suggests a key role for  
443 transcriptional plasticity in plant feeding arthropods that have evolved genuine  
444 generalism as opposed to cryptic sub-structuring of genetic variation by host  
445 species. The mechanisms by which this transcriptional plasticity is achieved are, as  
446 yet, unknown. However, given that in *M. persicae* differences in gene expression  
447 occur rapidly upon host transfer, and in the absence of genetic variation between  
448 host-adjusted lineages (experiments were performed with single aphids in the 2-day  
449 transfer experiments and with clonally reproducing individuals derived from a single  
450 parthenogenetic female in the 7-week and one-year aphid colonies), epigenetic  
451 mechanisms of gene expression regulation are likely responsible. Full length copies  
452 of the DNA methyltransferase (DNMT) genes DNMT1a, DNMT1b, DNMT2, DNMT3a  
453 and DNMT3b and all components of the histone modification system are present in  
454 *M. persicae*, as is the case for other aphid species [41, 42, 43], and epigenetic  
455 mechanisms have been shown to regulate plastic traits such as hymenopteran  
456 caste-specific behaviour [44].

457           Genes belonging to aphid-expanded clades of the cathepsin B and RR-2  
458 cuticular protein gene families contribute the largest percentages of differentially  
459 regulated genes upon host transfer and are therefore likely to play a key role in the  
460 ability of *M. persicae* to colonise members of Brassicaceae and Solanaceae.  
461 Cathepsin B proteins may serve digestive functions [45, 46], but are also known  
462 virulence factors, as they play major roles in invasion and intracellular survival of a  
463 number of pathogenic parasites [47, 48, 49]. For example, RNAi-mediated knock  
464 down of *Trypanosoma brucei* cathepsin B leads to clearance of parasites from the

465 bloodstream and prevents lethal infection in mice [50]. In the social aphid *Tuberaphis*  
466 *styraci*, cathepsin B has been detected as a major component of the venom  
467 produced by soldier aphids which is expelled through the stylets and injected into  
468 potential predators [51]. In *M. persicae*, three of the differentially expressed  
469 cathepsin B genes encode proteins with signal peptides, are expressed in the *M.*  
470 *persicae* salivary gland [23] and peptides corresponding to cathepsin B are found in  
471 proteome analyses of *M. persicae* saliva [52], suggesting they come into direct  
472 contact with plant components during feeding. Interestingly, cathepsin B genes  
473 involved in host adjustment have functionally diverged in *M. persicae* relative to other  
474 aphid species. Most of the differentially expressed cathepsin B genes belong to  
475 Cath\_Clade\_I, which has expanded in *M. persicae* relative to *A. pisum* and *D. noxia*  
476 (Figure 4A). Functional analysis of genes in this clade shows that most *M. persicae*  
477 copies possess a complete cysteine peptidase domain consisting of a propeptide  
478 domain and both cysteine and histidine active sites. In contrast, most *A. pisum* and  
479 *D. noxia* copies have an incomplete cysteine peptidase domain (Additional File 20:  
480 Figure S10). This is in agreement with previous observations that cathepsin B genes  
481 are under selection in aphids [53]. Our finding that cathepsin B genes are  
482 differentially regulated in response to *M. persicae* host transfer and that knock down  
483 of functionally diverged differentially expressed cathepsin B copies directly impacts  
484 *M. persicae* fitness in a host dependent manner highlights the key role of this gene  
485 family in aphid evolution.

486         Cuticular proteins bind chitin via extended version of the RR-1 and RR-2  
487 consensus sequences and provide the cuticle with structural support, mechanical  
488 protection and mobility [54]. Cuticular protein genes have different expression

489 profiles depending on the insect body part, mechanical property needs,  
490 developmental stage, temperature and seasonal photoperiodism [55, 56, 57, 58].  
491 RR-1 proteins are associated mostly with soft and flexible cuticle and RR-2 proteins  
492 in hard and rigid cuticles [59, 60]. Interestingly, members of the differentially  
493 regulated RR-2 cuticular proteins of *M. persicae* on different plant hosts have  
494 identical sequences as those shown to be associated with the acrostyle at the tip  
495 (last few microns) of the maxillary stylets of the *M. persicae* mouthparts where the  
496 food canal and salivary canals are fused [61]. The acrostyle is in the part of the stylet  
497 that performs intracellular punctures during probing and phloem feeding [62] and has  
498 a high concentration of cuticular proteins. It also interacts with virus particles that are  
499 transmitted by *M. persicae* [61]. Moreover, it is in direct contact with (effector)  
500 proteins of the aphid saliva and the plant cell contents, including the phloem sap  
501 [62]. Therefore, it is possible that the differential regulation of RR-2 cuticular protein  
502 genes enables *M. persicae* to adjust to the different physical and chemical attributes  
503 of cell walls, their contents, and defence responses of the diverged plant species.

504

## 505 **Conclusions**

506 We found that *M. persicae* adjustment to diverged plant species involves the  
507 unidirectional co-regulation of multigene families that lie within distinct multi-gene  
508 clusters in the aphid genome. Differential expression occurs rapidly, within 2 days,  
509 indicating strict regulatory control of these gene clusters. Up-regulation of these  
510 genes enables *M. persicae* survival and fecundity on the new host. Taken together,  
511 this study of the genome sequence of *M. persicae*, comparative genome analyses

512 and experimental study of host change have elucidated specific genes that are  
513 involved in the ability of *M. persicae* to colonise members of the Brassicaceae and  
514 has provided evidence that the rapid transcriptional plasticity of *M. persicae* plays a  
515 role in this aphids ability to adjust to diverged plant species.

516

## 517 **Materials and Methods**

### 518 **Preparation of *M. persicae* clones G006 and O for genome sequencing**

519 Clone G006 was collected from pepper in Geneva, NY, USA in 2003 [23].  
520 Since time of collection, G006 has been maintained on *Brassica oleracea* var.  
521 Wisconsin golden acre seedlings in a growth chamber under long day conditions of  
522 16h light: 8 hours of darkness at 20 °C constant temperature in the laboratory of  
523 Alexandra Wilson, University of Miami. Clone O is found on multiple crop and weed  
524 species in the UK and France, including *Brassica* species, potato and *Nicotiana*  
525 species [20, Simon, pers. Communication] and is being reared on Chinese cabbage  
526 (*Brassica rapa*; Brassicaceae), *Arabidopsis thaliana* (Brassicaceae) and *Nicotiana*  
527 *benthamiana* (Solanaceae) in our laboratory. A colony of *M. persicae* clone O  
528 starting from a single female was established on *B. rapa* in a growth chamber (14h  
529 light, 10h dark at constant 20 °C, 75% humidity) in 2010.

### 530 **Genome sequencing**

531 A single paired-end library and two mate-pair libraries were constructed for  
532 the G006 clone with insert sizes of approximately 200 (S6), 2000 (S8 MPB) and  
533 5000 (S7 MPA) bp and sequenced with 100bp paired-end run metrics using a

534 version 3 Illumina Hi-Seq paired-end flow cell to give ~95 Gb of sequencing reads.  
535 Illumina library construction and sequencing for clone G006 was performed at the  
536 University of Miami's Center for Genome Sequencing Core at the Hussman Institute  
537 for Human Genomics.

538 For the Clone O genome, three libraries were constructed, two paired-end  
539 libraries with an average fragment size of 380 (LIB1672) and 180 (LIB1673) bp and  
540 for scaffolding a mate-pair library with an average 8000bp insert size (LIB1472).  
541 Libraries were prepared at the Earlham Institute (Norwich, UK) using the Illumina  
542 TruSeq DNA Sample Preparation Kit. The resulting DNA libraries were sequenced  
543 with 100bp paired-end run metrics on a single lane of an Illumina HiSeq2000  
544 Sequencing System according to manufacturer's instructions.

#### 545 **Transcriptome sequencing**

546 Total RNA extracted from *Myzus* G006, tissues include whole female insects  
547 (WI), bacteriocytes (dissected from 300 adults) and guts (dissected from 300 adults).  
548 All RNA was treated with DNaseI before sending for sequencing at the University of  
549 Miami's Center for Genome Sequencing Core at the Hussman Institute for Human  
550 Genomics. Each sample was prepared for mRNA sequencing using an Epicenter  
551 PolyA ScriptSeqV2 kit and for small RNA sequencing using an Illumina TruSeq  
552 smRNA kit. All sequencing was performed as 2x100 reads on a HiSeq 2000. Each  
553 sample was prepared for both mRNA and small RNA sequencing.

554 To identify genes involved in *M. persicae* host adjustment we sequenced the  
555 transcriptomes of clone O colonies reared on *Brassica rapa* and *Nicotiana*  
556 *benthamiana*. Colonies were established from a single asexual female and reared



557 under long-day conditions (14h L 10h D) and constant 20° C and allowed to adapt  
558 for one year. Adult asexual females (1-week old) were then harvested in pools of  
559 approximately 50 individuals. Three independent pools were harvested from each  
560 plant species and RNA extracted using Tri-reagent (Sigma) followed by DNase  
561 digestion (Promega) and purification using the RNeasy kit (Qiagen). Samples were  
562 sent for sequencing at the Earlham Institute (Norwich, UK) where 1ug of RNA was  
563 purified to extract mRNA with a poly-A pull down and 6 non-orientated libraries  
564 (LIB949-LIB954) constructed using the Illumina TruSeq RNA Library Preparation kit  
565 following manufacturer's instructions. After cDNA synthesis 10 cycles of PCR were  
566 performed to amplify the fragments. Libraries were then pooled and sequenced on a  
567 single HiSeq 2000 lane generating 100bp paired-end sequences. Additionally to aid  
568 gene annotation a directional library (LIB1777) was constructed with RNA isolated  
569 from a mixture of asexual females at various developmental stages. Libraries were  
570 generated following the strand specific RNA sequencing method published by The  
571 Broad Institute [63], and sequenced to 100bp on a paired-end flow cell on the  
572 Illumina HiSeq2000 (Illumina, USA) ([Additional File 21: Table S7](#)).

### 573 **Construction of a small RNA library of *M. persicae***

574 RNA was extracted from 450 *M. persicae* nymphs using Tri-Reagent (Sigma).  
575 A small RNA library was prepared following the Illumina Small RNA v1.5 Sample  
576 Preparation protocol (Illumina Inc, San Diego, USA). Ligation of the 5` and 3` RNA  
577 adapters were conducted with 1µg RNA according to the manufacturers instructions  
578 (except that PCR was performed with 10mM dNTP in a 25µl reaction). Following  
579 ligation of the 5` and 3` RNA adapters, cDNA synthesis and PCR amplification,

580 fragments corresponding to adapter-sRNA-adapter ligations (93-100bp) were  
581 excised from polyacrylamide gels and eluted using the manufacturer's instructions.  
582 Sequencing was performed at The Sainsbury Laboratory (TSL, Norwich, UK) for  
583 36nt single-end sequencing on an Illumina Genome Analyzer.

#### 584 **Genome assembly and annotation**

585 Full details of genome assembly, annotation and quality control are given in  
586 [Additional File 2](#). Briefly, the genomes of *M. persicae* clones G006 and clone O were  
587 independently assembled using a combination of short insert paired-end and mate-  
588 pair libraries (Additional File 1: [Table S1](#)). Clone G006 was assembled with  
589 ALLPATHS-LG [64] and Clone O with ABySS [65] followed by scaffolding with  
590 SPPACE [66] and gapclosing with SOAP GapCloser [67]. Repetitive elements were  
591 annotated in both genomes with the REPET package (v2.0). We then predicted  
592 protein coding genes for each genome using the AUGUSTUS [68] and Maker [69]  
593 gene annotation pipelines using protein, cDNA and RNA-Seq alignments as  
594 evidence. A set of integrated gene models was derived from the AUGUSTUS and  
595 Maker gene predictions, along with the transcriptome and protein alignments, using  
596 EVIDENCEModeler [70]. Splice variants and UTR features were then added to the  
597 integrated EVIDENCEModeler predicted gene set using PASA [71]. Following these  
598 automatic gene annotation steps, manual annotation was performed for genes  
599 involved metabolism pathways and a subset of gene families implicated in host  
600 adjustment ([Additional File 3](#)).

#### 601 **Gene family clustering**

602 To investigate gene family evolution across arthropods we compiled a  
603 comprehensive set of proteomes for 17 insect lineages plus the branchiopod  
604 outgroup *D. pulex* and the spider mite *Tetranychus urticae* and combined them with  
605 the proteomes of the two newly sequenced *M. persicae* clones. In total 22 arthropod  
606 proteomes were included with all major insect lineages with publicly available  
607 genome sequences represented ([Additional File 22: Table S8](#)). In cases where  
608 proteomes contained multiple transcripts per gene the transcript with the longest  
609 CDS was selected. Although both *M. persicae* clones were included for clustering,  
610 comparisons between species were made using the G006 reference only. Putative  
611 gene families within our set of proteomes were identified based on Markov clustering  
612 of an all-against-all BLASTP search using the Markov Cluster Algorithm v.12.068  
613 (MCL) [27]. Blast hits were retained for clustering if they had an E-value less than  $1e^{-5}$   
614 and if the pair of sequences aligned over at least 50% of the longest sequence in  
615 the pair. MCL was then run on the filtered blast hits with an inflation parameter of 2.1  
616 and filtering scheme 6.

617 To estimate species phylogeny, protein sequences for 66 single copy  
618 conserved orthologs were extracted. For each gene, proteins were aligned using  
619 muscle v. 3.8.31 [72] followed by removal of poorly aligned regions with trimAl v. 1.2  
620 [73]. The curated alignments were then concatenated into a supermatrix.  
621 Phylogenetic relationships were estimated using maximum likelihood (ML) in RAxML  
622 v. 8.0.23 [28]. The supermatrix alignment was partitioned by gene and RAxML was  
623 run with automatic amino acid substitution model selection and gamma distributed  
624 rate variation for each partition. One hundred rapid bootstrap replicates were carried  
625 out followed by a thorough ML tree search. As the focus of the present study is not

626 on estimating absolute dates of divergence we used RelTime [29] to estimate the  
627 relative divergence times for species using the RAxML topology to generate an  
628 ultrametric phylogeny to use in the comparative analysis. RelTime has been shown  
629 to give relative dates of divergence that are well correlated with absolute divergence  
630 times derived from the most advanced Bayesian dating methods and is  
631 computationally tractable with large genomic datasets [29]. We estimated relative  
632 divergence times for species treating the supermatrix a single partition. RelTime was  
633 run with an LG model of protein evolution and the few clocks option (clocks merged  
634 on 2 std. errors).

### 635 **Analysis of gene family evolution**

636 Gene family evolution across arthropods was investigated using CAFE v.3.0  
637 [74]. CAFE models the evolution of gene family size across a species phylogeny  
638 under a maximum likelihood (ML) birth death model of gene gain and loss and  
639 simultaneously reconstructs maximum likelihood ancestral gene family sizes for all  
640 internal nodes, allowing the detection of expanded gene families within lineages. We  
641 ran CAFE on our matrix of gene family sizes generated by MCL under a birth death  
642 model of gene family evolution and modeled their evolution along the RelTime  
643 species tree. CAFE assumes that gene families are present in the last common  
644 ancestor of all species included in the analysis. To avoid biases in estimates of the  
645 rate of gene gain and loss we therefore removed gene families not inferred to be  
646 present in the last common ancestor of all taxa in the analysis based on maximum  
647 parsimony reconstruction of gene family presence / absence. Initial runs of CAFE  
648 produced infinite likelihood scores due to very large changes in family size for some

649 gene families. We therefore excluded gene families where copy number varied  
650 between species by more than 200 genes. In total 4,983 conserved gene families  
651 were included for analysis. To investigate variation in the rate of gene birth and  
652 death ( $\lambda$ ) across the arthropod phylogeny we tested a series of nested, increasingly  
653 complex, models of gene family evolution using likelihood ratio tests [75]. Models  
654 tested ranged from one with a single  $\lambda$  parameter across the whole phylogeny to a  
655 model with separate  $\lambda$  parameters for each of the major arthropod groups and a  
656 separate rate for each aphid species ([Additional File 23: Table S9](#)). For a more  
657 complex model to be considered an improvement a significant increase in likelihood  
658 had to be observed (likelihood ratio test,  $p < 0.05$ ). For the best fitting model of gene  
659 family evolution ('clade specific rates', [Additional File 24: Table S10](#)), the average  
660 per gene family expansion and the number of expanded families were compared for  
661 each taxon included in the analysis. To correct for evolutionary divergence between  
662 taxa, average per gene family expansion and the number of expanded gene families  
663 were normalised for each taxon by dividing by the relative divergence time from the  
664 MRCA of the taxon in question (RelTime tree, branch length from tip to first node).

### 665 **Aphid gene duplication history and patterns of molecular evolution**

666 To investigate the history of gene duplication in aphids we reconstructed the  
667 complete set of duplicated genes (paralogs) in *M. persicae* and *A. pisum* and  
668 calculated the rates of synonymous substitution per synonymous site ( $d_S$ ) and non-  
669 synonymous substitution per non-synonymous site ( $d_N$ ) between each duplicated  
670 gene and its most recent paralog. We then created age distributions for duplicate  
671 genes in the two aphid genomes based on  $d_S$  values between paralogs and

672 compared rates of evolution based on  $d_N/d_S$  ratios. Larger values of  $d_S$  represent  
673 older duplication events, and the  $d_N/d_S$  ratio reflects the strength and type of  
674 selection acting on the sequences. Paralog pairs were identified by conducting an  
675 all-against-all protein similarity search with BLASTP on the proteome of each  
676 species with an E-value cutoff of  $e^{-10}$ . When multiple transcripts of a gene were  
677 present in the proteome the sequence with the longest CDS was used. Paralogous  
678 gene pairs were retained if they aligned over at least 150 amino acids with a  
679 minimum of 30% identity [76]. For each protein only the nearest paralog was  
680 retained (highest scoring BLASTP hit, excluding self hits) and reciprocal hits were  
681 removed to create a non-redundant set of paralog pairs. For each paralog pair a  
682 protein alignment was generated with muscle v. 3.8.31 [72]. These alignments were  
683 then used to guide codon alignments of the CDS of each paralog pair using  
684 PAL2NAL [77]. From these codon alignments pairwise  $d_N$  and  $d_S$  values were  
685 calculated with paml v4.4 using YN00 [78]. Paralog pairs with  $d_S > 2$  were excluded  
686 from our analysis as they likely suffer from saturation. For the generation of age  
687 distributions we used all gene pairs that passed our alignment criteria. For  
688 comparisons of rates of evolution ( $d_N/d_S$ ) we applied strict filtering criteria to avoid  
689 inaccurate  $d_N/d_S$  estimates caused by insufficiently diverged sequences; pairs were  
690 removed if they had  $d_N$  or  $d_S$  less than 0.01 and fewer than 50 synonymous sites.  
691 We also calculated pairwise  $d_N$  and  $d_S$  for 1:1 orthologs between *M. persicae* and *A.*  
692 *pisum* (extracted from the MCL gene families). This allowed us to separate  
693 duplicated genes into ‘old’ (before speciation) and ‘young’ (after speciation)  
694 categories depending on whether  $d_S$  between a paralog pair was larger or smaller  
695 than the mean  $d_S$  between 1:1 orthologs which corresponds to the time of speciation

696 between the two aphid species. Adding 1:1 orthologs also allowed us to compare  
697 rates of evolution ( $d_N/d_S$ ) between single copy and duplicated genes. In addition to  
698 the pipeline above, we also identified tandemly duplicated genes in the *M. persicae*  
699 genome using MCSscanX [79].

#### 700 **RNA-seq analysis of *M. persicae* clone O colonies on different plant species**

701 To identify genes involved in *M. persicae* host adjustment we compared the  
702 transcriptomes of clone O colonies reared on either *B. rapa* or *N. benthamiana* for  
703 one year (LIB949 – LIB954, [Additional File 21: Table S7](#)). Reads were quality filtered  
704 using sickle v1.2 [80] with reads trimmed if their quality fell to below 20 and removed  
705 if their length fell to less than 60 bp. The remaining reads were mapped to the G006  
706 reference genome with Bowtie v1.0 [81] and per gene expression levels estimated  
707 probabilistically with RSEM v1.2.8 [82]. We identified differentially expressed genes  
708 with DEseq [83] using per gene expected counts for each sample generated by  
709 RSEM. To increase statistical power to detect differentially expressed genes, lowly  
710 expressed genes falling into the lowest 40% quantile were removed from the  
711 analysis. Genes were considered differentially expressed between the two  
712 treatments if they had a significant p value after accounting for a 10% false discovery  
713 rate according to the Benjamini-Hochberg procedure and if a fold change in  
714 expression of at least a 1.5 was observed.

#### 715 **qRT-PCR analyses**

716 Total RNA was isolated from adults using Trizol reagent (Invitrogen) and  
717 subsequent DNase treatment using an RNase-free DNase I (Fermentas). cDNA was  
718 synthesised from 1 µg total RNA with RevertAid First Strand cDNA Synthesis Kit

719 (Fermentas). The qRT-PCRs reactions were performed on CFX96 Touch™ Real-  
720 Time PCR Detection System using gene-specific primers ([Additional File 25: Table](#)  
721 [S11](#)). Each reaction was performed in a 20 µL reaction volume containing 10µL  
722 SYBR Green (Fermentas), 0.4 µL Rox Reference Dye II, 1 µL of each primers (10  
723 mM), 1 µL of sample cDNA, and 7.6 µL UltraPure Distilled water (Invitrogen). The  
724 cycle programs were: 95°C for 10 s, 40 cycles at 95°C for 20 s, 60°C for 30 s.  
725 Relative quantification was calculated using the comparative  $2^{-\Delta Ct}$  method [84]. All  
726 data were normalised to the level of *Tubulin* from the same sample. Design of gene-  
727 specific primers were achieved by two steps. First, we used PrimerQuest Tool  
728 (Integrated DNA technologies, Iowa USA) to generate five to ten qPCR primer pairs  
729 for each gene. Then, primer pairs were aligned against cathepsin B and cuticular  
730 protein genes. Only primers aligned to unique sequences were used ([Additional File](#)  
731 [25: Table S11](#)). Genes for which no unique primers could be designed were  
732 excluded from analyses.

### 733 **Plant host switch experiments**

734 The *M. persicae* clone O colony reared on *B. rapa* was reared from a single  
735 female and then transferred to *A. thaliana* and *N. benthamiana* and reared on these  
736 plants for at least 20 generations. Then, 3<sup>rd</sup> instar nymphs were transferred from *A.*  
737 *thaliana* to *N. benthamiana* and vice versa for three days upon which the insects  
738 were harvested for RNA extractions and qRT-PCR analyses.

### 739 **Cloning of dsRNA constructs and generation of transgenic plants**

740 A fragment corresponding to the coding sequence of MpCathB4 ([Additional File](#)  
741 [18](#)) was amplified from *M. persicae* cDNA by PCR with specific primers containing



742 additional attb1 (ACAAGTTTGTACAAAAAAGCAGGCT) and attb2 linkers  
743 (ACCACTTTGTACAAGAAAGCTGGGT) (MpCathB4 attB1 and MpCathB7 attB2,  
744 [Additional File 25: Table S11](#)) for cloning with the Gateway system (Invitrogen). A  
745 242-bp MpCathB4 fragment was introduced into pDONR207 (Invitrogen) plasmid  
746 using Gateway BP reaction and transformed into DH5 $\alpha$ . Subsequent clones were  
747 sequenced to verify correct size and sequence of inserts. Subsequently, the inserts  
748 were introduced into the pJawohl8-RNAi binary silencing vector (kindly provided by  
749 I.E. Somssich, Max Planck Institute for Plant Breeding Research, Germany) using  
750 Gateway LB reaction generating plasmids pJMpCathB4, which was introduced into  
751 *A. tumefaciens* strain GV3101 containing the pMP90RK helper plasmid for  
752 subsequent transformation of *A. thaliana* using the floral dip method [85]. Seeds  
753 obtained from the dipped plants were sown and seedlings were sprayed with  
754 phosphinothricin (BASTA) to selection of transformants. F2 seeds were germinated  
755 on Murashige and Skoog (MS) medium supplemented with 20 mg ml BASTA for  
756 selection. F2 plants with 3:1 dead/alive segregation of seedlings (evidence of single  
757 insertion) were taken forward to the F3 stage. Seeds from F3 plants were sown on  
758 MS+BASTA and lines with 100% survival ratio (homozygous) were selected. The  
759 presence of pJMpCathB4 transgenes was confirmed by PCR and sequencing. Three  
760 independent pJMpCathB4 transgenic lines were taken forward for experiments with  
761 aphids. These were At\_dsCathB 5-1, 17-5 and 18-2.

762 To assess if the 242-bp MpCathB4 fragment targets sequences beyond  
763 cathepsin B genes, 242-bp sequence was blastn-searched against the *M. persicae*  
764 clones G006 and O predicted transcripts at AphidBase and cut-off e-value of 0.01.  
765 The sequence aligned to nucleotide sequences of MpCathB1 to B13 and

766 MpCathB17 with the best aligned for MpCathB4 (241/242, 99% identity) and lowest  
767 score for MpCathB17 (74/106, 69% identity) ([Additional File 18](#)). *M. persicae* fed on  
768 At\_dsCathB 5-1, 17-5 and 18-2 transgenic lines had lower transcript levels of  
769 AtCathB1 to B11, whereas that of MpCathB12 was not reduced ([Fig. 4.1A](#)). Identity  
770 percentages of the 242-bp fragment to AtCathB1 to B11 range from 99% to 77%,  
771 whereas that of MpCathB12 is 73% ([Additional File 18](#)). Thus, identity scores higher  
772 than 73-77% are needed to obtain effective RNAi-mediated transcript reduction in *M.*  
773 *persicae*.

#### 774 **Plant-mediated RNA interference (RNAi) of GPA cathepsin B genes**

775 Seed of the pJMpCathB4 homozygous lines (expressing dsRNA corresponding  
776 to Cathepsin B, dsCathB, [Additional File 18](#)) was sown and seedlings were  
777 transferred to single pots (10 cm diameter) and transferred to an environmental  
778 growth room at temperature 18 °C day/16 °C night under 8 hours of light. The aphids  
779 were reared for 4 generations on *A. thaliana* transgenic plants producing dsGFP  
780 (controls) and dsCathB. Five *M. persicae* adults were confined to single 4-week-old  
781 *A. thaliana* lines in sealed experimental cages (15.5 cm diameter and 15.5 cm  
782 height) containing the entire plant. Two days later adults were removed and five  
783 nymphs remained on the plants. The number of offspring produced on the 10th,  
784 14th, 16th day of the experiment were counted and removed. This experiment was  
785 repeated three times to create data from three independent biological replicates with  
786 four plants per line per replicate.

787

788 **Data availability**

789 All assemblies and annotation features are available and downloadable at  
790 [www.aphidbase.com](http://www.aphidbase.com) [86]. Sequence data has been deposited in the sequence read  
791 archive at the European Nucleotide Archive (ENA) and are available under  
792 BioProject accessions PRJEB11304 (clone O) and PRJNA319804 (G006).

793

794 **Competing interests**

795 The authors declare that they have no competing interests.

796

797 **Acknowledgements**

798 We thank Brain Fenton for help with genotyping *M. persicae* clone O, Linda M.  
799 Field for being a co-investigator on the Capacity and Capability Challenge (CCC-15)  
800 project that funded the first round of genome sequencing of *M. persicae* clone O. We  
801 are grateful to Ian Bedford and Gavin Hatt (JIC Insectary) for rearing and care of  
802 aphids and the John Innes Horticultural Services for growing the plants used in this  
803 study. Next-generation sequencing and library construction was delivered via the  
804 BBSRC National Capability in Genomics (BB/J010375/1) at the Earlham Institute  
805 (formerly The Genome Analysis Centre), Norwich, by members of the Platforms and  
806 Pipelines Group.

807

808 **Funding**

| <b>Funder</b>                                                                                                                                                             | <b>Grant reference number</b>                | <b>Author</b>                                                                                     |
|---------------------------------------------------------------------------------------------------------------------------------------------------------------------------|----------------------------------------------|---------------------------------------------------------------------------------------------------|
| Biotechnology and Biological Sciences Research Council (BBSRC), Institute Strategic Program Grant at the Earlham Institute (formerly The Genome Analysis Centre), Norwich | BB/J004669/1<br><br>(Allocated under CCC-15) | Saskia A. Hogenhout, Linda M. Field, Brian Fenton, Alex C. C. Wilson, Georg Jander and Denis Tagu |
| BBSRC – Industrial Partnership Award (IPA) with Syngenta Ltd                                                                                                              | BB/L002108/1                                 | Saskia A. Hogenhout, David Swarbreck and Cock van Oosterhout                                      |
| BBSRC – Institute Strategic Program Grant (ISPG) Biotic Interactions for Crop Productivity (BIO)                                                                          | BB/J004553/1                                 | Giles Oldroyd, Richard Morris and project leaders of the BIO ISPG, including Saskia A. Hogenhout  |
| United States Department of Agriculture (USDA) – National Institute for Food and Agriculture (NIFA)                                                                       | 2010-65105-20558                             | Alex C. C. Wilson, Georg Jander                                                                   |
| The funders had no role in study design, data collection and interpretation, or the decision to submit the work for publication.                                          |                                              |                                                                                                   |

810 **References**

- 811 1. Thompson JN. Coevolution: the geographic mosaic of coevolutionary arms  
812 races. *Curr Biol* 2005, 15:R992-994.
- 813 2. Poulin R, Keeney DB. Host specificity under molecular and experimental  
814 scrutiny. *Trends Parasitol* 2008, 24:24-28.
- 815 3. Schoonhoven LM, Van Loon JJA, Dicke M: *Insect-Plant Biology*. 2nd edn.  
816 New York: Oxford University Press Inc.; 2005.
- 817 4. Ravenph EP. Butterflies and plants: a study in coevolution. *Evolution* 1964,  
818 18.
- 819 5. Kawecki TJ. Red queen meets Santa Rosalia. arms races and the evolution of  
820 host specialisation in organisms with parasitic lifestyles. *Am Nat* 1998,  
821 152:635-651.
- 822 6. Cui H, Tsuda K, Parker JE. Effector-triggered immunity: from pathogen  
823 perception to robust defence. *Annu Rev Plant Biol* 2015, 66:487-511.
- 824 7. Hogenhout SA, Bos JI. Effector proteins that modulate plant--insect  
825 interactions. *Curr Opin Plant Biol* 2011, 14:422-428.
- 826 8. Koehler AV, Springer YP, Randhawa HS, Leung TL, Keeney DB, Poulin R.  
827 Genetic and phenotypic influences on clone-level success and host  
828 specialization in a generalist parasite. *J Evol Biol* 2012, 25:66-79.
- 829 9. Betson M, Nejsum P, Bendall RP, Deb RM, Stothard JR. Molecular  
830 epidemiology of ascariasis: a global perspective on the transmission  
831 dynamics of *Ascaris* in people and pigs. *J Infect Dis* 2014, 210:932-941.

- 832 10. Bickford D, Lohman DJ, Sodhi NS, Ng PK, Meier R, Winker K, Ingram KK,  
833 Das I. Cryptic species as a window on diversity and conservation. Trends Ecol  
834 Evol 2007, 22:148-155.
- 835 11. Giraud T, Refrégier G, Le Gac M, de Vienne DM, Hood ME. Speciation in  
836 fungi. Fungal Genet Biol 2008, 45:791-802.
- 837 12. van Emden HF, Harrington R 2007. Aphids as crop pests, CABI. 2007, doi:  
838 10.1079/9780851998190.0000.
- 839 13. Peccoud J, Ollivier A, Plantegenest M, Simon JC. A continuum of genetic  
840 divergence from sympatric host races to species in the pea aphid complex.  
841 Proc Natl Acad Sci U S A 2009, 106:7495-7500.
- 842 14. Derocles SA, Evans DM, Nichols PC, Evans SA, Lunt DH. Determining plant-  
843 leaf miner-parasitoid interactions: a DNA barcoding approach. PLoS One  
844 2015, 10:e0117872.
- 845 15. McMullan M, Gardiner A, Bailey K, Kemen E, Ward BJ, Cevik V, Robert-  
846 Seilaniantz A, Schultz-Larsen T, Balmuth A, Holub E, van Oosterhout C,  
847 Jones JD. Evidence for suppression of immunity as a driver for genomic  
848 introgressions and host range expansion in races of *Albugo candida*, a  
849 generalist parasite. Elife 2015, 4.
- 850 16. Centre for Agriculture and Biosciences International (CABI). *Myzus persicae*  
851 (green peach aphid). Invasive Species Compendium. Wallingford, UK: CAB  
852 International. 2015, <http://www.cabi.org/isc/datasheet/35642>.
- 853 17. Blackman RL. Life cycle variation of *Myzus persicae* (Sulz.) (Hom., Aphididae)  
854 in different parts of the world, in relation to genotype and environment. Bull  
855 Entomol Res 1974, 63:595-607.

- 856 18. van Emden HF, Eastop VF, Hughes RD, Way MJ. The ecology of *Myzus*  
857 *persicae*. Annu Rev Entomol 1969, 14: 197-270.
- 858 19. Fenton B, Woodford JA, Malloch G: Analysis of clonal diversity of the peach-  
859 potato aphid, *Myzus persicae* (Sulzer), in Scotland, UK and evidence for the  
860 existence of a predominant clone. Mol Ecol 1998, 7:1475-1487.
- 861 20. Fenton B, Malloch G, Woodford JA, Foster SP, Anstead J, Denholm I, King L,  
862 Pickup J: The attack of the clones. tracking the movement of insecticide-  
863 resistant peach-potato aphids *Myzus persicae* (Hemiptera: Aphididae). Bull  
864 Entomol Res 2005, 95:483-494.
- 865 21. Hopkins RJ, van Dam NM, van Loon JJ. Role of glucosinolates in insect-plant  
866 relationships and multitrophic interactions. Annu Rev Entomol 2009, 54:57-83.
- 867 22. Todd AT, Liu E, Polvi SL, Pammett RT, Page JE. A functional genomics  
868 screen identifies diverse transcription factors that regulate alkaloid  
869 biosynthesis in *Nicotiana benthamiana*. Plant J 2010, 62:589-600.
- 870 23. Ramsey JS, Wilson AC, de Vos M, Sun Q, Tamborindoguy C, Winfield A,  
871 Malloch G, Smith DM, Fenton B, Gray SM, Jander G. Genomic resources for  
872 *Myzus persicae*: EST sequencing, SNP identification, and microarray design.  
873 BMC Genomics 2007, 8:423.
- 874 24. Fenton B, Margaritopoulos JT, Malloch GL, Foster SP. Micro-evolutionary  
875 change in relation to insecticide resistance in the peach-potato aphid, *Myzus*  
876 *persicae*. Ecoll Entomol 2010, 35:131-146.
- 877 25. Wilson AC, Ashton PD, Calevro F, Charles H, Colella S, Febvay G, Jander G,  
878 Kushlan PF, Macdonald SJ, Schwartz JF, Thomas GH, Douglas AE.  
879 Genomic insight into the amino acid relations of the pea aphid, *Acyrtosiphon*

- 880 *pisum*, with its symbiotic bacterium *Buchnera aphidicola*. Insect Mol Biol 2010,  
881 19 Suppl 2:249-258.
- 882 26. International aphid genomics consortium. Genome sequence of the pea aphid  
883 *Acyrtosiphon pisum*. PLoS Biol 2010, 8:e1000313.
- 884 27. Enright AJ, Van Dongen S, Ouzounis CA. An efficient algorithm for large-  
885 scale detection of protein families. Nucleic Acids Res 2002, 30:1575-1584.
- 886 28. Stamatakis A. RAxML version 8: a tool for phylogenetic analysis and post-  
887 analysis of large phylogenies. Bioinformatics 2014, 30:1312-1313.
- 888 29. Tamura K, Battistuzzi FU, Billings-Ross P, Murillo O, Filipowski A, Kumar S.  
889 Estimating divergence times in large molecular phylogenies. Proc Natl Acad  
890 Sci U S A 2012, 109:19333-19338.
- 891 30. Misof B, Liu S, Meusemann K, Peters RS, Donath A, Mayer C, Frandsen PB,  
892 Ware J, Flouri T, Beutel RG, Niehuis O, Petersen M, Izquierdo-Carrasco F,  
893 Wappler T, Rust J, Aberer AJ, Aspöck U, Aspöck H, Bartel D, Blanke A,  
894 Berger S, Böhm A, Buckley TR, Calcott B, Chen J, Friedrich F, Fukui M, Fujita  
895 M, Greve C, Grobe P, Gu S, Huang Y, Jermiin LS, Kawahara AY, Krogmann  
896 L, Kubiak M, Lanfear R, Letsch H, Li Y, Li Z, Li J, Lu H, Machida R, Mashimo  
897 Y, Kapli P, McKenna DD, Meng G, Nakagaki Y, Navarrete-Heredia JL, Ott M,  
898 Ou Y, Pass G, Podsiadlowski L, Pohl H, von Reumont BM, Schütte K, Sekiya  
899 K, Shimizu S, Slipinski A, Stamatakis A, Song W, Su X, Szucsich NU, Tan M,  
900 Tan X, Tang M, Tang J, Timelthaler G, Tomizuka S, Trautwein M, Tong X,  
901 Uchifune T, Walz MG, Wiegmann BM, Wilbrandt J, Wipfler B, Wong TK, Wu  
902 Q, Wu G, Xie Y, Yang S, Yang Q, Yeates DK, Yoshizawa K, Zhang Q, Zhang  
903 R, Zhang W, Zhang Y, Zhao J, Zhou C, Zhou L, Ziesmann T, Zou S, Li Y, Xu



- 904 X, Zhang Y, Yang H, Wang J, Wang J, Kjer KM, Zhou X. Phylogenomics  
905 resolves the timing and pattern of insect evolution. *Science* 2014, 346:763-  
906 767.
- 907 31. Huerta-Cepas J, Capella-Gutiérrez S, Pryszcz LP, Marcet-Houben M,  
908 Gabaldón T. PhylomeDB v4: zooming into the plurality of evolutionary  
909 histories of a genome. *Nucleic Acids Res* 2014, 42:D897-902.
- 910 32. Gabaldón T. Large-scale assignment of orthology: back to phylogenetics?  
911 *Genome Biol* 2008, 9:235.
- 912 33. Huerta-Cepas J, Gabaldón T. Assigning duplication events to relative  
913 temporal scales in genome-wide studies. *Bioinformatics* 2011, 27:38-45.
- 914 34. Rebers JE, Riddiford LM. Structure and expression of a *Manduca sexta* larval  
915 cuticle gene homologous to *Drosophila* cuticle genes. *J Mol Biol* 1988,  
916 203:411-423.
- 917 35. Hunt VL, Tsai IJ, Coghlan A, Reid AJ, Holroyd N, Foth BJ, Tracey A, Cotton  
918 JA, Stanley EJ, Beasley H, Bennett HM, Brooks K, Harsha B, Kajitani R,  
919 Kulkarni A, Harbecke D, Nagayasu E, Nichol S, Ogura Y, Quail MA, Randle  
920 N, Xia D, Brattig NW, Soblik H, Ribeiro DM, Sanchez-Flores A, Hayashi T,  
921 Itoh T, Denver DR, Grant W, Stoltzfus JD, Lok JB, Murayama H, Wastling J,  
922 Streit A, Kikuchi T, Viney M, Berriman M. The genomic basis of parasitism in  
923 the *Strongyloides* clade of nematodes. *Nat Genet* 2016, 48:299-307.
- 924 36. Hu X, Xiao G, Zheng P, Shang Y, Su Y, Zhang X, Liu X, Zhan S, St Leger RJ,  
925 Wang C. Trajectory and genomic determinants of fungal-pathogen speciation  
926 and host adaptation. *Proc Natl Acad Sci U S A* 2014, 111:16796-16801.

- 927 37. Pitino M, Coleman AD, Maffei ME, Ridout CJ, Hogenhout SA. Silencing of  
928 aphid genes by dsRNA feeding from plants. *PLoS One* 2011, 6:e25709.
- 929 38. Coleman AD, Wouters RH, Mugford ST, Hogenhout SA. Persistence and  
930 transgenerational effect of plant-mediated RNAi in aphids. *J Exp Bot* 2015,  
931 66:541-548.
- 932 39. Grbić M, Van Leeuwen T, Clark RM, Rombauts S, Rouzé P, Grbić V, Osborne  
933 EJ, Dermauw W, Ngoc PC, Ortego F, Hernández-Crespo P, Diaz I, Martinez  
934 M, Navajas M, Sucena É, Magalhães S, Nagy L, Pace RM, Djuranović S,  
935 Smagghe G, Iga M, Christiaens O, Veenstra JA, Ewer J, Villalobos RM, Hutter  
936 JL, Hudson SD, Velez M, Yi SV, Zeng J, Pires-daSilva A, Roch F, Cazaux M,  
937 Navarro M, Zhurov V, Acevedo G, Bjelica A, Fawcett JA, Bonnet E, Martens  
938 C, Baele G, Wissler L, Sanchez-Rodriguez A, Tirry L, Blais C, Demeestere K,  
939 Henz SR, Gregory TR, Mathieu J, Verdon L, Farinelli L, Schmutz J, Lindquist  
940 E, Feyereisen R, van de Peer Y. The genome of *Tetranychus urticae* reveals  
941 herbivorous pest adaptations. *Nature* 2011, 479:487-492.
- 942 40. de la Paz Celorio-Mancera M, Wheat CW, Vogel H, Söderlind L, Janz N, Nylin  
943 S. *Mechanisms of macroevolution: polyphagous plasticity in butterfly larvae*  
944 revealed by RNA-Seq. *Mol Ecol* 2013, 22:4884-4895.
- 945 41. Nicholson SJ, Nickerson ML, Dean M, Song Y, Hoyt PR, Rhee H, Kim C,  
946 Puterka GJ. The genome of *Diuraphis noxia*, a global aphid pest of small  
947 grains. *BMC Genomics* 2015, 16:429.
- 948 42. Rider SD, Jr., Srinivasan DG, Hilgarth RS. Chromatin-remodelling proteins of  
949 the pea aphid, *Acyrtosiphon pisum* (Harris). *Insect Mol Biol* 2010, 19 Suppl  
950 2:201-214.

- 951 43. Walsh TK, Brisson JA, Robertson HM, Gordon K, Jaubert-Possamai S, Tagu  
952 D, Edwards OR. A functional DNA methylation system in the pea aphid,  
953 *Acyrtosiphon pisum*. *Insect Mol Biol* 2010, 19 Suppl 2:215-228.
- 954 44. Simola DF, Graham RJ, Brady CM, Enzmann BL, Desplan C, Ray A, Zwiebel  
955 LJ, Bonasio R, Reinberg D, Liebig J, Berger SL. Epigenetic (re)programming  
956 of caste-specific behavior in the ant *Camponotus floridanus*. *Science* 2016,  
957 351:aac6633.
- 958 45. Fuzita FJ, Pinkse MW, Patane JS, Juliano MA, Verhaert PD, Lopes AR.  
959 Biochemical, transcriptomic and proteomic analyses of digestion in the  
960 scorpion *Tityus serrulatus*: insights into function and evolution of digestion in  
961 an ancient arthropod. *PLoS One* 2015, 10:e0123841.
- 962 46. Santamaría S, Galeano J, Pastor JM, Mendéz M. Removing interactions,  
963 rather than species, casts doubt on the high robustness of pollination  
964 networks. *OIKOS* 2015, 125:526-534.
- 965 47. Karrer KM, Peiffer SL, DiTomas ME. Two distinct gene subfamilies within the  
966 family of cysteine protease genes. *Proc Natl Acad Sci U S A* 1993, 90:3063-  
967 3067.
- 968 48. Na BK, Kim TS, Rosenthal PJ, Lee JK, Kong Y. Evaluation of cysteine  
969 proteases of *Plasmodium vivax* as antimalarial drug targets: sequence  
970 analysis and sensitivity to cysteine protease inhibitors. *Parasitol Res* 2004,  
971 94:312-317.
- 972 49. McKerrow JH, Caffrey C, Kelly B, Loke P, Sajid M. Proteases in parasitic  
973 diseases. *Annu Rev Pathol* 2006, 1:497-536.

- 974 50. Abdulla MH, O'Brien T, Mackey ZB, Sajid M, Grab DJ, McKerrow JH. RNA  
975 interference of *Trypanosoma brucei* cathepsin B and L affects disease  
976 progression in a mouse model. PLoS Negl Trop Dis 2008, 2:e298.
- 977 51. Kutsukake M, Shibao H, Nikoh N, Morioka M, Tamura T, Hoshino T, Ohgiya  
978 S, Fukatsu T. Venomous protease of aphid soldier for colony defense. Proc  
979 Natl Acad Sci U S A 2004, 101:11338-11343.
- 980 52. Thorpe P, Cock PJ, Bos J. Comparative transcriptomics and proteomics of  
981 three different aphid species identifies core and diverse effector sets. BMC  
982 Genomics 2016, 17:172.
- 983 53. Rispe C, Kutsukake M, Doublet V, Hudaverdian S, Legeai F, Simon JC, Tagu  
984 D, Fukatsu T. Large gene family expansion and variable selective pressures  
985 for cathepsin B in aphids. Mol Biol Evol 2008, 25:5-17.
- 986 54. Willis JH. Structural cuticular proteins from arthropods: annotation,  
987 nomenclature, and sequence characteristics in the genomics era. Insect  
988 Biochem Mol Biol 2010, 40:189-204.
- 989 55. Rebers JE, Willis JH. A conserved domain in arthropod cuticular proteins  
990 binds chitin. Insect Biochem Mol Biol 2001, 31:1083-1093.
- 991 56. Le Trionnaire G, Jaubert S, Sabater-Munoz B, Benedetto A, Bonhomme J,  
992 Prunier-Leterme N, Martinez-Torres D, Simon JC, Tagu D. Seasonal  
993 photoperiodism regulates the expression of cuticular and signalling protein  
994 genes in the pea aphid. Insect Biochem Mol Biol 2007, 37:1094-1102.
- 995 57. Cortés T, Tagu D, Simon JC, Moya A, Martinez-Torres D. Sex versus  
996 parthenogenesis: a transcriptomic approach of photoperiod response in the

- 997 model aphid *Acyrtosiphon pisum* (Hemiptera: Aphididae). *Gene* 2008,  
998 408:146-156.
- 999 58. Gallot A, Rispe C, Leterme N, Gauthier JP, Jaubert-Possamai S, Tagu D.  
1000 Cuticular proteins and seasonal photoperiodism in aphids. *Insect Biochem*  
1001 *Mol Biol* 2010, 40:235-240.
- 1002 59. Togawa T, Dunn WA, Emmons AC, Nagao J, Willis JH. Developmental  
1003 expression patterns of cuticular protein genes with the R&R Consensus from  
1004 *Anopheles gambiae*. *Insect Biochem Mol Biol* 2008, 38:508-519.
- 1005 60. Dittmer NT, Hiromasa Y, Tomich JM, Lu N, Beeman RW, Kramer KJ, Kanost  
1006 MR. Proteomic and transcriptomic analyses of rigid and membranous cuticles  
1007 and epidermis from the elytra and hindwings of the red flour beetle, *Tribolium*  
1008 *castaneum*. *J Proteome Res* 2012, 11:269-278.
- 1009 61. Uzest M, Gargani D, Dombrovsky A, Cazevieille C, Cot D, Blanc S. The  
1010 "acrostyle": a newly described anatomical structure in aphid stylets. *Arthropod*  
1011 *Struct Dev* 2010, 39:221-229.
- 1012 62. Peterson MA, Dobler S, Larson EL, Juarez D, Schlarbaum T, Monsen KJ,  
1013 Francke W. Profiles of cuticular hydrocarbons mediate male mate choice and  
1014 sexual isolation between hybridising *Chrysochus* (Coleoptera :  
1015 Chrysomelidae). *Chemoecology* 2007, 17:87-96.
- 1016 63. Levin JZ, Yassour M, Adiconis X, Nusbaum C, Thompson DA, Friedman N,  
1017 Gnirke A, Regev A. Comprehensive comparative analysis of strand-specific  
1018 RNA sequencing methods. *Nat Methods* 2010, 7:709-715.
- 1019 64. Gnerre S, Maccallum I, Przybylski D, Ribeiro FJ, Burton JN, Walker BJ,  
1020 Sharpe T, Hall G, Shea TP, Sykes S, Berlin AM, Aird D, Costello M, Daza R,

- 1021 Williams L, Nicol R, Gnrirke A, Nusbaum C, Lander ES, Jaffe DB. High-quality  
1022 draft assemblies of mammalian genomes from massively parallel sequence  
1023 data. *Proc Natl Acad Sci U S A* 2011, 108:1513-1518.
- 1024 65. Simpson JT, Wong K, Jackman SD, Schein JE, Jones SJ, Birol I. ABySS: a  
1025 parallel assembler for short read sequence data. *Genome Res* 2009,  
1026 19:1117-1123.
- 1027 66. Boetzer M, Henkel CV, Jansen HJ, Butler D, Pirovano W. Scaffolding pre-  
1028 assembled contigs using SSPACE. *Bioinformatics* 2011, 27:578-579.
- 1029 67. Luo R, Liu B, Xie Y, Li Z, Huang W, Yuan J, He G, Chen Y, Pan Q, Liu Y,  
1030 Tang J, Wu G, Zhang H, Shi Y, Liu Y, Yu C, Wang B, Lu Y, Han C, Cheung  
1031 DW, Yiu SM, Peng S, Xiaoqian Z, Liu G, Liao X, Li Y, Yang H, Wang J, Lam  
1032 TW, Wang J. SOAPdenovo2: an empirically improved memory-efficient short-  
1033 read de novo assembler. *Gigascience* 2012, 1:18.
- 1034 68. Stanke M, Waack S. Gene prediction with a hidden Markov model and a new  
1035 intron submodel. *Bioinformatics* 2003, 19 Suppl 2:ii215-225.
- 1036 69. Cantarel BL, Korf I, Robb SM, Parra G, Ross E, Moore B, Holt C, Sánchez  
1037 Alvarado A, Yandell M. MAKER: an easy-to-use annotation pipeline designed  
1038 for emerging model organism genomes. *Genome Res* 2008, 18:188-196.
- 1039 70. Haas BJ, Salzberg SL, Zhu W, Pertea M, Allen JE, Orvis J, White O, Buell  
1040 CR, Wortman JR. Automated eukaryotic gene structure annotation using  
1041 EVIDENCEModeler and the program to assemble spliced alignments. *Genome  
1042 Biol* 2008, 9:R7.
- 1043 71. Haas BJ, Delcher AL, Mount SM, Wortman JR, Smith RK Jr, Hannick LI, Maiti  
1044 R, Ronning CM, Rusch DB, Town CD, Salzberg SL, White O. Improving the

- 1045 Arabidopsis genome annotation using maximal transcript alignment  
1046 assemblies. *Nucleic Acids Res* 2003, 31:5654-5666.
- 1047 72. Edgar RC. MUSCLE: multiple sequence alignment with high accuracy and  
1048 high throughput. *Nucleic Acids Res* 2004, 32:1792-1797.
- 1049 73. Capella-Gutiérrez S, Silla-Martinez JM, Gabaldón T. trimAl: a tool for  
1050 automated alignment trimming in large-scale phylogenetic analyses.  
1051 *Bioinformatics* 2009, 25:1972-1973.
- 1052 74. Han MV, Thomas GW, Lugo-Martinez J, Hahn MW. Estimating gene gain and  
1053 loss rates in the presence of error in genome assembly and annotation using  
1054 CAFE 3. *Mol Biol Evol* 2013, 30:1987-1997.
- 1055 75. Hahn MW, Demuth JP, Han SG. Accelerated rate of gene gain and loss in  
1056 primates. *Genetics* 2007, 177:1941-1949.
- 1057 76. Fawcett JA, Maere S, Van de Peer Y. Plants with double genomes might have  
1058 had a better chance to survive the Cretaceous-Tertiary extinction event. *Proc*  
1059 *Natl Acad Sci U S A* 2009, 106:5737-5742.
- 1060 77. Suyama M, Torrents D, Bork P. PAL2NAL: robust conversion of protein  
1061 sequence alignments into the corresponding codon alignments. *Nucleic Acids*  
1062 *Res* 2006, 34:W609-612.
- 1063 78. Yang Z. PAML 4: phylogenetic analysis by maximum likelihood. *Mol Biol Evol*  
1064 2007, 24:1586-1591.
- 1065 79. Wang Y, Tang H, Debarry JD, Tan X, Li J, Wang X, Lee TH, Jin H, Marler B,  
1066 Guo H, Kissinger JC, Paterson AH. MCScanX: a toolkit for detection and  
1067 evolutionary analysis of gene synteny and collinearity. *Nucleic Acids Res*  
1068 2012, 40:e49.

- 1069 80. Joshi NA, Fass JN. Sickle: A sliding-window, adaptive, quality-based trimming  
1070 tool for FastQ files (Version 1.33) [Software]. 2011, Available at  
1071 <https://github.com/najoshi/sickle>.
- 1072 81. Langmead B, Trapnell C, Pop M, Salzberg SL. Ultrafast and memory-efficient  
1073 alignment of short DNA sequences to the human genome. *Genome Biol* 2009,  
1074 10:R25.
- 1075 82. Li B, Dewey CN. RSEM: accurate transcript quantification from RNA-Seq data  
1076 with or without a reference genome. *BMC Bioinformatics* 2011, 12:323.
- 1077 83. Anders S, Huber W. Differential expression analysis for sequence count data.  
1078 *Genome Biol* 2010, 11:R106.
- 1079 84. Schmittgen TD, Livak KJ. Analyzing real-time PCR data by the comparative  
1080 C(T) method. *Nat Protoc* 2008, 3:1101-1108.
- 1081 85. Bechtold N, Ellis J, Pelletier G. In planta *Agrobacterium*-mediated gene  
1082 transfer by infiltration of adult *Arabidopsis thaliana* plants. *C R Acad Sci Ser III*  
1083 *Sci Vie Life Sci* 316: 1194-1199.
- 1084 86. Legeai F, Shigenobu S, Gauthier JP, Colbourne J, Risper C, Collin O,  
1085 Richards S, Wilson AC, Murphy T, Tagu D. AphidBase: a centralized  
1086 bioinformatic resource for annotation of the pea aphid genome. *Insect Mol*  
1087 *Biol* 2010, 19 Suppl 2:5-12.
- 1088 87. Yang Z, Nielsen R. Synonymous and nonsynonymous rate variation in  
1089 nuclear genes of mammals. *J Mol Evol* 1998, 46:409-418.
- 1090 88. Price MN, Dehal PS, Arkin AP. FastTree 2—approximately maximum-  
1091 likelihood trees for large alignments. *PLoS One* 2010, 5:e9490.



- 1092 89. Maere S, Heymans K, Kuiper M. BiNGO: a Cytoscape plugin to assess  
 1093 overrepresentation of gene ontology categories in biological  
 1094 networks. *Bioinformatics* 2005, 21:3448-3449.
- 1095 90. Supek F, Bošnjak M, Škunca N, Šmuc T. REVIGO summarizes and visualizes  
 1096 long lists of gene ontology terms. *PloS one* 2011, 18:e21800.
- 1097 91. Nelson DR. The cytochrome p450 homepage. *Human genomics*. 2009, 4:59-  
 1098 65.

1099

1100

1101 **Tables**

**Table 1.** Genome assembly and annotation summary

| Statistic                      | <i>M. persicae</i> |             | <i>A. pisum</i> |
|--------------------------------|--------------------|-------------|-----------------|
|                                | Clone O            | Clone G006  | Release 2.1b    |
| <b>Genome</b>                  |                    |             |                 |
| # sequences (> = 1 kb)         | 13407              | 4018        | 12969           |
| Largest scaffold               | 1,018,155          | 2,199,663   | 3,073,041       |
| Total length                   | 354,698,803        | 347,304,760 | 541,675,471     |
| Total length (> = 1 kb)        | 354,698,803        | 347,300,841 | 532,843,107     |
| N50                            | 164,460            | 435,781     | 570,863         |
| GC%                            | 30.19              | 30.03       | 29.69           |
| # Ns                           | 11,562,637         | 1,836,185   | 36,934,320      |
| Median kmer Coverage           | 44X                | 51X         | NA              |
| CEGMA (% complete genes)       | 94.35              | 94.35       | 93.15           |
| <b>Annotation</b>              |                    |             |                 |
| Gene Count (Coding)            | 18,433             | 18,529      | 36,939          |
| Total transcripts              | 30,247             | 30,127      | 36,939          |
| Transcripts per gene           | 1.64               | 1.63        | 1.00            |
| Transcript mean size cDNA (bp) | 2119.36            | 2163.47     | 1964.11         |

1102

## 1103 **Figure Legends**

1104 **Figure 1:** High rate of lineage specific gene accumulation in aphids relative to all  
1105 other insect orders. Figures show arthropod phylogenetic relationships, per genome  
1106 proportions of single copy (blue) and duplicated (red) genes, and orthology  
1107 relationships amongst arthropod genes based on gene family clustering with MCL  
1108 [27]. Phylogenetic relationships amongst arthropod species included for gene family  
1109 clustering were estimated using RAxML [28] based on a protein alignment of 66  
1110 single copy orthologs found in all taxa. This topology and protein alignment was then  
1111 used to infer relative divergence times with RelTime [29] under an LG substitution  
1112 model. Inset shows relative rate of lineage specific gene accumulation for all  
1113 included insect orders and comparison with aphids. Error bars show standard  
1114 deviation of species within a given grouping. Relative rates of lineage specific gene  
1115 accumulation were calculated for each species by dividing the number of group  
1116 specific genes (either order specific or aphid specific) by the crown plus stem age for  
1117 the given group (in relative divergence time).

1118

1119 **Figure 2:** *M. persicae* experienced greater gene loss rates (**A**) and stronger purifying  
1120 selection in retained ancestral duplicates (**B**) than *A. pisum*. **A**) Age distribution of  
1121 duplicated genes in *M. persicae* and *A. pisum*. The number of synonymous  
1122 substitutions per synonymous site ( $d_s$ ) was calculated between paralog pairs for *M.*  
1123 *persicae* (green) and *A. pisum* (blue) using the YN00 [87] model in PAML [78]. For  
1124 each duplicated gene only the most recent paralog was compared. Pairwise  $d_s$  was  
1125 also calculated for 1:1 orthologs between *M. persicae* and *A. pisum* (red), the peak in  
1126 which corresponds to the time of speciation between the two aphid species. After

1127 filtering, 1,955 *M. persicae* paralog pairs, 7,253 *A. pisum* paralog pairs and 2,123 1:1  
1128 orthologs were included for comparison. Mean  $d_S$  of 1:1 orthologs between *A. pisum*  
1129 and *M. persicae* was 0.26. **B)** Box plots showing median  $d_N/d_S$  for *A. pisum* and *M.*  
1130 *persicae* paralog pairs that duplicated before and after speciation of the two aphid  
1131 species and for 1:1 orthologs between the two species. Older duplicate genes have  
1132 lower  $d_N/d_S$  than recently duplicated genes (since speciation) indicating stronger  
1133 purifying selection in ancestral versus recent duplicates. Additionally, older duplicate  
1134 genes in *M. persicae* have significantly lower  $d_N/d_S$  than in *A. pisum* (Mann-Whitney  
1135 U = 1816258, *M. persicae*: 1,348 paralog pairs, *A. pisum*: 3,286 paralog pairs,  $p = <$   
1136 0.00001) indicating stronger genome streamlining in *M. persicae* than in *A. pisum*.  
1137 Box plots are shaded by species as in **A**.

1138  
1139 **Figure 3:** The set of differentially expressed genes of *M. persicae* clone O reared on  
1140 *B. rapa* and *N. benthamiana* is enriched for **(A)** genes belonging to gene families  
1141 with known functions, **(B)** tandemly duplicated genes in the *M. persicae* genome, **(C)**  
1142 genes belonging to gene families expanded in aphids or unique to aphids, **(D)**  
1143 duplicated genes before *M. persicae* and *A. pisum* diverged and **(E)** genes with  
1144 stronger purifying selection than the genome wide average. **A - C)** Volcano plots of  
1145 differentially expressed genes of *M. persicae* reared on *B. rapa* and *N. benthamiana*.  
1146 Negative  $\log_2$  fold changes indicate up-regulation on *B. rapa* and positive values  
1147 indicate up-regulation on *N. benthamiana* **A)** Differentially expressed genes from four  
1148 gene families that have the highest number of differentially expressed genes are  
1149 highlighted. These are: RR2 cuticular proteins (n=22), Cathepsin B (n=10), UDP-  
1150 glucosyltransferase (n=8) and Cytochrome P450 (n=5). **B)** The set of differentially  
1151 expressed genes is enriched for tandemly duplicated genes. **C)** The set of

1152 differentially expressed genes is enriched for genes from families that are either  
1153 significantly expanded in aphids compared to other arthropods (binomial test, main  
1154 text), or are unique to aphids. **D)** Time since most recent duplication (measured as  
1155  $d_S$ ) for all paralogs in the *M. persicae* genome compared to those differentially  
1156 expressed upon host transfer. Duplicated genes implicated in host adjustment (at  
1157 least one of the pair differentially expressed) have a significantly different distribution  
1158 to the genome wide average ( $p < 0.05$ , permutation test of equality) and are enriched  
1159 for genes that duplicated before *M. persicae* and *A. pisum* diverged. **E)**  $d_N/d_S$   
1160 distribution for duplicated genes differentially expressed upon host transfer vs. the  
1161 genome wide average. Duplicated genes involved in host adjustment are under  
1162 significantly stronger purifying selection than the genome wide average (median  
1163  $d_N/d_S = 0.2618$  vs.  $0.3338$ , Mann–Whitney  $U = 105,470$ ,  $p = 1.47 \times 10^{-4}$ , two-tailed).

1164

1165 **Figure 4:** Cathepsin B genes that are differentially expressed upon *M. persicae* host  
1166 change belong predominantly to a single aphid-expanded clade and form gene  
1167 clusters in the *M. persicae* genome. **A)** Maximum likelihood phylogenetic tree of  
1168 arthropod cathepsin B protein sequences. The sequences were aligned with Muscle  
1169 [72] and the phylogeny estimated using FastTree [88] (JTT + CAT rate variation).  
1170 Circles on branches indicate SH-like local support values  $>80\%$ , scale bar below  
1171 indicates 0.1 substitutions per site. Rings from outside to inside: ring 1, *M. persicae*  
1172 cathepsin B (MpCathB) gene identities (IDs) with numbers in red indicating up-  
1173 regulation of these genes in *M. persicae* reared for one year on *B. rapa* relative to  
1174 those reared for one year on *N. benthamiana*, and bold font indicating location on the  
1175 cathepsin B multigene clusters shown in **B**; ring 2, red squares indicating MpCathB

1176 genes that are differentially expressed upon *M. persicae* host change; ring 3, cathB  
1177 genes from different arthropods following the colour scheme of the legend in the  
1178 upper left corner and matching the colours of the branches of the phylogenetic tree;  
1179 ring 4, aphid expanded (AE) clades with AE\_Clade I labelled light green and  
1180 AE\_Clade II light blue. **B)** MpCathB multigene clusters of the *M. persicae* genome.  
1181 Lines indicate the genomic scaffolds on which the MpCathB genes are indicated with  
1182 block arrows. Gene IDs above the genes match those of the phylogenetic tree in A,  
1183 with block arrows and fonts highlighted in red being differentially expressed upon  
1184 host change. Scale bar on right shows 1 kb. **C)** Relative expression levels of  
1185 MpCathB genes of *M. persicae* at 7 weeks being reared on *N. benthamiana* (Nb), *B.*  
1186 *rapa* (Br) and *A. thaliana* (At). Numbers under the graphs indicate MpCathB gene  
1187 IDs with those in red font DE as in A. Batches of five adult females were harvested  
1188 for RNA extraction and qRT-PCR assays. Bars represent expression values (mean  $\pm$   
1189 standard deviation (SD)) of three independent biological replicates. \* $p < 0.05$  (Anova  
1190 with Fishers LSD to control for multiple tests). **D)** As in C, except that individual  
1191 aphids reared on At were transferred to At (At to At) or Nb (At to Nb) and harvested  
1192 at 2 days upon transfer. **E)** As in D, except that individual aphids reared on Nb were  
1193 transferred to Nb (Nb to Nb) or At (Nb to At) and harvested at 2 days upon transfer.  
1194  
1195 **Figure 5:** RNA interference (RNAi)-mediated knock-down of the expression of  
1196 multiple cathepsin B genes reduces *M. persicae* survival and fecundity on *A. thaliana*.  
1197 **A)** Relative cathepsin B (CathB) expression levels (compared to aphids on *dsGFP*  
1198 (control) plants) of *M. persicae* on three independent transgenic lines (line 5-1, line  
1199 17-5, and line 18-2) producing double-stranded (ds) RNA corresponding to multiple

1200 *M. persicae* cathepsin B genes (dsCathB) (Figure 3A, Additional File 19: Figure S9).  
1201 Aphids were reared on the transgenic lines for four generations. Batches of five adult  
1202 females were harvested for RNA extraction and qRT-PCR assays. Bars represent  
1203 expression values (mean  $\pm$  standard deviation (SD)) of three independent biological  
1204 replicates. **B)** CathB-RNAi *M. persicae* produces less progeny compared to control  
1205 (dsGFP-treated) aphids on *A. thaliana*. Five nymphs were transferred to single plants  
1206 and produced nymphs on approximately day 5. Nymph counts were conducted on  
1207 days 7, 9, and 11 and removed. Columns show the mean  $\pm$  SD of the total nymph  
1208 counts for these three days of three biological replicates, with each replicate  
1209 consisting nymphs produced by 15 aphids at 5 aphids per plant (n = 3 plants). **C and**  
1210 **D)** Survival rates of CathB-RNAi and control (dsGFP-exposed) *M. persicae* on non-  
1211 transgenic *A. thaliana* (At) and *N. benthamiana* (Nb) plants. Ten 3<sup>rd</sup> instar nymphs on  
1212 dsCathB and dsGFP transgenic plants were transferred to non-transgenic plants,  
1213 survival rate were recorded two days later. Bars represent mean  $\pm$  SD of three  
1214 biological replicates, with each replicate consisting of the survival rates of 30 aphids  
1215 at 10 aphids per plants (n = 3 plants). **E and F)** Fecundity rates of CathB-RNAi and  
1216 control (dsGFP-exposed) *M. persicae* on non-transgenic *A. thaliana* (At) and *N.*  
1217 *benthamiana* (Nb) plants. Nymph counts were conducted as in **B**. Asterisks (\*) and  
1218 different letters (a, b) above the bars indicate significant difference at  $p < 0.05$  (Anova  
1219 with Fishers LSD to control for multiple tests).

1220

## 1221 Additional Files

### 1222 **Additional File 1: Table S1**

1223 Format: .docx

1224 Summary of libraries generated and datasets used for assembly of the genomes of  
1225 *Myzus persicae* clones G006 and O.

1226

1227 **Additional File 2**

1228 Format: .docx

1229 Supplementary Text: Genome assembly, annotation and quality control.

1230

1231 **Additional File 3**

1232 Format: .docx

1233 Supplementary Text: Annotation of metabolic processes and specific gene families.

1234

1235 **Additional File 4**

1236 Format: .docx

1237 Figure S1: Maximum likelihood phylogeny of 21 arthropod species with fully  
1238 sequenced genomes based on 66 strictly conserved singly copy orthologs.

1239 Sequences were aligned with MUSCLE [72] and trimmed to remove poorly aligned  
1240 regions with TrimAl [73]. The phylogeny was estimated using RAxML [28] with each  
1241 gene treated as a separate partition. Automatic protein model selection was  
1242 implemented in RAxML with gamma distributed rate variation. Values at nodes show  
1243 bootstrap support based on 100 rapid bootstrap replicates carried out with RAxML.

1244

1245 **Additional File 5**

1246 Format: .docx

1247 Figure S2: Enriched GO terms relating to biological processes of aphid specific *M.*  
1248 *persicae* genes. GO term enrichment analysis was carried out using Fishers' exact  
1249 test in BINGO [89] with correction for multiple testing applied by the Benjamini-  
1250 Hochberg procedure allowing for a 10% false discovery rate. GO terms from aphid  
1251 specific genes were compared to GO terms from the complete set of *M. persicae*  
1252 genes. Enriched GO terms were reduced and visualised with REVIGO [90]. GO  
1253 terms are clustered by semantic similarity with the size of each circle relative to the  
1254 size of the GO term in UniProt (larger circles = more general GO terms) and  
1255 coloured by their p values according to the Fisher exact test of enrichment. A  
1256 complete list of enriched GO terms for aphid specific genes are given in [Additional](#)  
1257 [File 6: Table S2](#).

1258

#### 1259 **Additional File 6**

1260 Format: .xlsx

1261 Table S2: Overrepresented GO terms in aphid specific genes compared to the  
1262 genome as a whole. Overrepresented GO terms identified with BINGO [89] using  
1263 Fisher's exact test accounting for a 10% false discovery rate.

1264

#### 1265 **Additional File 7**

1266 Format: .docx

1267 Figure S3: Model based analysis of gene gain and loss across arthropods. Gene  
1268 gain and loss ( $\lambda$ ) was modelled across the arthropod phylogeny under a birth-death  
1269 process with CAFE [74] for 4,983 widespread gene families inferred to be present in  
1270 the most recent common ancestor (MRCA) of all included taxa. Nested models with



1271 increasing numbers of lambda parameters were compared using likelihood ratio test  
1272 ([Additional File 23: Table S9](#); [Additional File 24: Table S10](#)). Results are shown for  
1273 the best fitting clade specific rates model. **A)** Arthropod phylogeny scaled by clade  
1274 specific ML values of  $\lambda$  inferred by CAFE. Branch colours indicate where separate  $\lambda$   
1275 parameters were specified. *A. pisum* (red) has undergone a significant increase in  
1276 the rate of gene gain and loss ( $\lambda$ ) compared to other arthropod species. **B)** Linear  
1277 regression line (mean and 5-95% confidence intervals) of the number of expanded  
1278 families versus the gain in gene number per family across arthropod taxa. Both the  
1279 size of the expansion and the number of expanded families were  $\log_{10}$  transformed  
1280 and scaled relative to the divergence time. There is a significant positive relationship  
1281 across arthropod taxa in the number of families that expand, and the mean number  
1282 of genes gained within the expanded families (Regression:  $R^2=29.4\%$ ;  $F_{1,19}=9.32$ ,  
1283  $p=0.007$ ). The specialist aphid *A. pisum* (red) is an outlier, showing a relative excess  
1284 in both the number of expanded families and the magnitude of the mean family  
1285 expansion. In contrast, although the generalist aphid *M. persicae* (green) has many  
1286 expanded families, it shows relatively little gene gain per family.

1287

### 1288 **Additional File 8**

1289 Format: .xlsx

1290 Table S3: MCL gene families significantly expanded according to the binomial test in:

1291 **A)** both aphid species, **B)** *M. persicae* but not *A. pisum*, **C)** *A. pisum* but not *M.*

1292 *persicae*. The number of genes per MCL gene family for each species included for

1293 gene family clustering is given. p values were calculated for each of the two aphid

1294 species, for each MCL family, by comparing the number of members in *M. persicae*

1295 or *A. pisum* to a binomial distribution drawn from the mean family size excluding  
1296 aphids. A p value less than 0.05 was considered to imply a significant gene family  
1297 expansion. In total 6,148 MCL families found in both aphid species and at least one  
1298 other taxon were tested. MCL gene families are ordered by prevalence in taxa other  
1299 than aphids with the most widespread families listed first. MCL families with at least  
1300 one *M. persicae* member differentially expressed in the host swap RNA-seq  
1301 experiment are highlighted in yellow. Each expanded MCL family is annotated with  
1302 expression information for *M. persicae* family members in the host swap RNA-seq  
1303 experiment (averaged across all 6 RNA-seq libraries and expressed in fragments per  
1304 kilobase of transcript per million mapped reads (FPKM)), number and proportion of  
1305 *M. persicae* members differentially expressed in the host swap RNA-seq experiment,  
1306 InterProScan domains and descriptions, InterProScan GO terms and Blast2GO GO  
1307 terms and descriptions. All families are annotated based on *M. persicae* members.

1308

#### 1309 **Additional File 9**

1310 Format: .docx

1311 Figure S4: The rate of evolution ( $d_N/d_S$ ) versus time since duplication ( $d_S$ ) for *A.*  
1312 *pisum* and *M. persicae* paralog pairs. Paralog pairs that duplicated before the  
1313 divergence of *A. pisum* and *M. persicae* ( $d_S > 0.26$ ) are coloured blue, paralog pairs  
1314 that duplicated after the divergence of *A. pisum* and *M. persicae* ( $d_S < 0.26$ ) are  
1315 coloured red.

1316

#### 1317 **Additional File 10**

1318 Format: .docx

1319 Supplementary Text: *M. persicae* phylome report.

1320

1321 **Additional File 11**

1322 Format: .docx

1323 Table S4: *M. persicae* genes that are differentially expressed in aphids reared on

1324 different host plants. Genes that show differential expression (>1.5-fold with 10%

1325 FDR) on *Nicotiana benthamiana* vs. *Brassica rapa* (Nb/Br) are listed. Top: genes

1326 more highly expressed on *B. rapa*, and bottom: more highly expressed on *N.*

1327 *benthamiana*. Fold-change is the average over 3 biological replicates on each host

1328 plant, *p*-value and FDR-adjusted-*p*-value (*padj*) based on DE-seq analysis.

1329 Annotations were conducted by NCBI blastX using cDNA sequences. FC is fold-

1330 change of Nb expression vs. Br. The presence of a predicted secretory signal

1331 peptide is indicated with “\*” in the SP column. Tissue-specific expression is indicated

1332 with “+” in the “SG” (salivary gland), “Gut” and “Head” columns, based on detection

1333 of the sequence in tissue-specific EST data [23].

1334

1335 **Additional File 12**

1336 Format: .docx

1337 Figure S5: The Rebers and Riddiford subgroup 2 (RR-2) cuticular protein genes that

1338 are differentially expressed upon *M. persicae* host change belong predominantly to a

1339 single aphid-expanded clade and form gene clusters in the *M. persicae* genome. **A)**

1340 Maximum likelihood phylogenetic tree of arthropod RR-2 cuticular protein protein

1341 sequences. The sequences were aligned with Muscle [72] and the phylogeny

1342 estimated using FastTree [88] (JTT + CAT rate variation). Circles on branches

1343 indicate SH-like local support values >80%, scale bar below indicates 0.1  
1344 substitutions per site. Rings from outside to inside: ring 1, *M. persicae* RR-2 cuticular  
1345 protein (MpCutP) gene identities (IDs) with numbers in red indicating upregulation of  
1346 these genes in *M. persicae* reared for one year on *N. benthamiana* relative to those  
1347 reared for one year on *B. rapa*, and bold font indicating location on the RR-2  
1348 cuticular protein multigene clusters shown in **B**; ring 2, red squares indicating  
1349 MpCutP genes that are differentially expressed upon *M. persicae* host change; ring  
1350 3, CutP genes from different arthropods following the color scheme of the legend in  
1351 the lower left corner and matching the colors of the branches of the phylogenetic  
1352 tree; ring 4, aphid expanded (AE) clades with AE\_Clade I labeled light green and  
1353 AE\_Clade II light blue. **B**) MpCutP multigene clusters of the *M. persicae* genome.  
1354 Lines indicate the genomic scaffolds on which the MpCutP genes are indicated with  
1355 block arrows. Gene IDs above the genes match those of the phylogenetic tree in A,  
1356 with block arrows and fonts highlighted in red being DE upon host change. Scale bar  
1357 on right shows 20 kb. **C**) Relative expression levels of MpCutP genes of *M. persicae*  
1358 at 7 weeks being reared on *N. benthamiana* (Nb), *B. rapa* (Br) and *A. thaliana* (At).  
1359 Numbers under the graphs indicate MpCutP gene IDs with those in red font  
1360 differentially expressed as in A. Batches of five adult females were harvested for  
1361 RNA extraction and qRT-PCR assays. Bars represent expression values (mean  $\pm$   
1362 standard deviation (SD)) of three independent biological replicates. \* $p < 0.05$  (Anova  
1363 with Fishers LSD to control for multiple tests). **D**) As in C, except that individual  
1364 aphids reared on At were transferred to At (At to At) or Nb (At to Nb) and harvested  
1365 at 2 days upon transfer. **E**) As in D, except that individual aphids reared on Nb were  
1366 transferred to Nb (Nb to Nb) or At (Nb to At) and harvested at 2 days upon transfer.

1367

1368 **Additional File 13**

1369 Format: .docx

1370 Figure S6: UDP-glucosyltransferase (UGT) genes that show differential expression  
1371 on different host plants fall within an aphid specific clade, and some are associated  
1372 with an array of tandem duplicates. Phylogeny of (UGT) proteins from *M. persicae*  
1373 (green), *A. pisum* (blue), *R. prolixus* (purple) and *D. melanogaster* (red). Protein  
1374 sequences were aligned with Muscle [72] and the phylogeny estimated using RAxML  
1375 [28] with automatic model selection and gamma distributed rate variation. 100 rapid  
1376 bootstrap replicates were carried out with RAxML. Grey circles on branches indicate  
1377 bootstrap support greater than 80%. Genes showing elevated expression in aphid  
1378 reared on *B. rapa* are indicated in red. Bottom, part of scaffold\_555 containing 7  
1379 predicted UGT genes, 4 of which are more highly expressed on *B. rapa* host plants.  
1380 Scale bar at left is 10 kb.

1381

1382 **Additional File 14**

1383 Format: .docx

1384 Figure S7: Maximum likelihood phylogeny of Cytochrome-P450 proteins from *M.*  
1385 *persicae* (green), and *A. pisum* (blue). *A. pisum* P450s are named according to their  
1386 annotation from the Cytochrome-P450 homepage [91]. Protein sequences were  
1387 aligned with Muscle [72] and the phylogeny estimated using RAxML [28] with  
1388 automatic model selection and gamma distributed rate variation. 100 rapid bootstrap  
1389 replicates were carried out with RAxML. Grey circles on branches indicate bootstrap  
1390 support greater than 80%. Transcripts that show elevated expression on *B. rapa* are

1391 indicated with red arrowhead, and on *N. benthamiana* with a green arrowhead.  
1392 Bottom: scaffold 338 containing 4 differentially expressed cytochrome-P450 genes  
1393 (red), together with 3 non-regulated p450s (white) is shown. (\*locus 000111270 is  
1394 one of 8 *M. persicae* P450 genes that were excluded from phylogenetic analysis  
1395 after manual curation as they were either fragmented or had incorrect annotations.

1396

1397 **Additional File 15**

1398 Format: .docx

1399 Figure S8: Maximum likelihood phylogeny of *M. persicae*, *A. pisum* and *D.*  
1400 *melanogaster* lipase-like genes (MCL family 16). Protein sequences were aligned  
1401 with Muscle [72] and the phylogeny estimated using RAxML [28] with automatic  
1402 model selection and gamma distributed rate variation. 500 rapid bootstrap replicates  
1403 were carried out with RAxML, bootstrap support values are shown at nodes. Genes  
1404 showing significantly elevated expression on *B. rapa* are indicated with red arrows.  
1405 Below, part of scaffold 351 which contains 4 lipase-like genes in a tandem array, 3 of  
1406 which are up-regulated in aphids reared on *B. rapa*.

1407

1408 **Additional File 16**

1409 Format: .xlsx

1410 Table S5: Rates of evolution for all *M. persicae* paralog pairs containing at least one  
1411 DE gene between *M. persicae* clone O reared for 1 year on *B. rapa* or *N.*  
1412 *benthamiana*. Pairwise  $d_N/d_S$  was estimated using the YN00 [87] model in PAML  
1413 [78]. Paralog pairs are ordered by  $d_S$  (youngest duplicates first). Light green shading

1414 indicates duplication after speciation of *M. persicae* and *A. pisum* ( $d_S < 0.26$ ).

1415 Paralog pairs coloured red have 0  $d_S$  and  $d_N$  (identical coding sequences).

1416

1417 **Additional File 17**

1418 Format: .docx

1419 Figure S8.5: Performance of *M. persicae* clone O on three plant species. Three one-  
1420 day old *M. persicae* clone O nymphs were placed on the youngest leaf of each of the  
1421 following plant species: *Arabidopsis thaliana*; (At); *Brassica rapa* (Br); and *Nicotiana*  
1422 *benthamiana* (Nb)]. The aphids were then examined for developmental time,  
1423 reproduction rate, longevity, and weight. The developmental time is the duration in  
1424 days between birth of the nymph and emergence of the adult. The reproduction rate  
1425 is the number of progeny produced by a single adult female over a period of 10 days.  
1426 The weight is measured for 10 adult females on the first day they become adults.  
1427 The longevity is the number of days between birth and death. Columns represent  
1428 values (mean  $\pm$  SD) from 10 independent biological replicates ( $p > 0.05$ ).

1429

1430 **Additional File 18**

1431 Format: .docx

1432 Cathepsin B dsRNA alignment. Blast search results of the cathepsin B dsRNA  
1433 sequence used to generate transgenic lines for plant-mediated RNAi of GPA. The  
1434 242-bp fragment of MpCathB4 (Clone O) was blastn-searched against the annotated  
1435 genome of *M. persicae* clones G006. Identities and gaps of 242 bp with MpCathB4,  
1436 MpCathB5, MpCath10 and MPCathB11 (indicated with \*) were generated by NCBI  
1437 blastn suite-2 sequences because these were misannotated in MyzDB (G006).

1438

1439 **Additional File 19**

1440 Format: .docx

1441 Figure S9: Cathepsin B expression levels of CathB-RNAi and control (dsGFP-  
1442 exposed) aphids after two days on non-transgenic *A. thaliana* and *N. benthamiana*  
1443 plants. Ten 3<sup>rd</sup> instar nymphs on *dsCathB* (lines 17-5 and 18-2) and *dsGFP*  
1444 transgenic *A. thaliana* lines were transferred to non-transgenic *A. thaliana* (At) (**A**)  
1445 and non-transgenic *N. benthamiana* (Nb) (**B**) plants. Aphids were harvested two  
1446 days later for RNA extraction and qRT-PCR analyses. Bars represent mean  $\pm$  SD of  
1447 the relative *M. persicae* CathB expression levels (compared to aphids on *dsGFP*  
1448 (control) plants) of three independent biological replicates with five adult females  
1449 each. \* $p < 0.05$ .

1450

1451 **Additional File 20**

1452 Format: .docx

1453 Figure S10: Domain analysis of aphid-specific cathepsin B genes. Protein  
1454 sequences were used for analysis in InterPro. Clade highlighted in light green aphid-  
1455 specific clade I, and the blue is aphid-specific clade II. Asterisks (\*) indicate  
1456 cathepsin B with complete domains, green asterisks are *M. persicae* cathepsins B,  
1457 blue asterisks are the *A. pisum* ones, and a red asterisk are the *D. noxia* ones.

1458

1459 **Additional File 21**

1460 Format: .docx



1461 Table S7: Summary of all newly generated *M. persicae* RNA-seq transcriptome data.

1462 SS = Strand-specific RNA-seq reads

1463

1464 **Additional File 22**

1465 Format: .xlsx

1466 Table S8: Proteomes of 22 arthropod genomes used for comparative gene family

1467 analyses.

1468

1469 **Additional File 23**

1470 Format: .docx

1471 Table S9: Models tested in the CAFE analysis of gene family evolution. Increasingly

1472 complex models of gene family evolution were tested using CAFE [74] with a focus

1473 on determining if aphid rates of gene gain and loss (gain=loss= $\lambda$ ) differ from that of

1474 other arthropod lineages. Regions of the arthropod phylogeny with different  $\lambda$

1475 parameters were specified with the  $\lambda$  tree (newick format), which follows the species

1476 tree. For each model, 5 runs were conducted to check convergence. F.P. = free

1477 parameters, Lh. = likelihood, S.D. = standard deviation.

1478

1479 **Additional File 24**

1480 Format: .docx

1481 Table S10: Likelihood ratio test results comparing models of gene family evolution

1482 estimated in CAFE [74]. Models tested are detailed in [Additional File 23: Table S9](#).

1483 Likelihood ratio tests were conducted in a nested fashion comparing more complex

1484 models to less complex models. The best fitting model tested was the clade specific

1485 rates model, which gave a significant increase in likelihood over all other more  
1486 simple models. The difference in the number of free parameters between each  
1487 model is shown below the shaded squares. The likelihood ratio and p value (in  
1488 brackets) for each model comparison are shown to the right of the shaded squares.  
1489 For each model the best likelihood score out of five runs was used to calculate the  
1490 likelihood ratio. The likelihood ratio was calculated as follows: likelihood ratio =  $2 \times$   
1491  $((\text{likelihood more complex model}) - (\text{likelihood less complex model}))$ . p values for the  
1492 likelihood ratio test were generated by comparing the likelihood ratio between the  
1493 more complex model and the less complex model to a chi square distribution with  
1494 the degrees of freedom equal to the difference in the number of free parameters  
1495 between the two models.

1496

1497 **Additional File 25**

1498 Format: .docx

1499 Table S11: Sequences of primers used in Gateway cloning and qRT-PCR  
1500 experiments.

1501

1502 **Additional File 26**

1503 Format: .docx

1504 Table S12: List of cathepsin B genes annotated in the genome of the pea aphid  
1505 *Acyrtosiphon pisum*.

1506

1507 **Additional File 27**

1508 Format: .docx

1509 Table S13: List of cathepsin B genes annotated in the genomes of *Myzus persicae*  
1510 clones G006 and O. Four fragments were annotated as MpCathB1 and two as  
1511 MpCathB3 in Clone O. Alignment of fragments to corresponding genes indicated that  
1512 fragments were part of the gene. The sequences of MpCathB1 and MpCathB3 in  
1513 clone O were confirmed by PCR and sequencing. MpCathB2, MpCathB7, and  
1514 MpCathB12 were missing in the genome annotation of *M. persicae* clone O; their  
1515 sequences were confirmed by PCR and sequencing.

1516

1517 **Additional File 28**

1518 Format: .xlsx

1519 Table S14: Cathepsin B genes for 26 arthropod species. Cathepsin B sequences  
1520 were previously annotated for *A. pisum* by Rispe et al. (53). These sequences all fall  
1521 into MCL family\_110. Additional Cathepsin B sequences were identified for *N.*  
1522 *lugens*, *D. citri*, *D. noxia* and *M. destructor* based on blastp similarity searches to *M.*  
1523 *persicae* clone G006 cathepsin B sequences (see sub tables A-D). Sequences  
1524 coloured red were considered fragments and excluded from subsequent  
1525 phylogenetic analysis.

1526

1527 **Additional File 29**

1528 Format: .xlsx

1529 Table S15: Annotation of cuticular proteins in 5 hemipteran species. A) Overview of  
1530 cuticular protein family size in 5 hemipteran genomes. Cuticular proteins were  
1531 identified using CutProtFamPred on the proteomes of *M. persicae* clone G006, *A.*  
1532 *pisum*, *D. noxia*, *D. citri*, *N. lugens* and *R. prolixus*. The number of genes DE

1533 between *M. persicae* clone O individuals reared on either *B. rapa* or *N. benthamiana*  
1534 is also given for each family. Full results of the CutProfFamPred analysis for all 5  
1535 proteomes are given in B). The RR2 cuticular protein family has the highest number  
1536 of genes DE between aphids reared on *B. rapa* and *N. benthamiana* and was  
1537 subjected to phylogenetic analysis. Due to the high variability of RR2 cuticular  
1538 proteins phylogenetic analysis was carried out on the RR2 domain only. 8 genes  
1539 were removed from the analysis due to poor alignment of the RR2 domain. C) blastp  
1540 identification of the RR2 domain in RR2 cuticular proteins.

1541

1542 **Additional File 30**

1543 Format: .docx

1544 Table S16: Summary of the manual annotation and gene edition of *M. persicae*  
1545 (clone G006) CPR as described in [Additional File 3](#).

1546

1547 **Additional File 31**

1548 Format: .xlsx

1549 Table S17: P450 genes identified in *M. persicae* clone G006. P450 genes were  
1550 identified based on blastp searches against *A. pisum* P450 sequences obtained from  
1551 the P450 website [91] and presence of the PF00067 P450 domain. Genes were  
1552 manually checked for completeness and missannotated genes removed from the  
1553 phylogenetic analysis (highlighted in red).

1554

1555 **Additional File 32**

1556 Format: .xlsx

1557 Table S18: Functional annotation of *M. persicae* clone G006 lipase-like proteins

1558 found in MCL family\_16.

1559

1560 **Additional File 33**

1561 **Table S19:** UDP-glucosyltransferase (UGT) genes found in *M. persicae* clone G006,

1562 *A. pisum*, *R. prolixus* and *D. melanogaster*. UGT genes were identified by searching

1563 the MCL gene families for known *D. melanogaster* UGT proteins listed in FlyBase

1564 ([www.flybase.org/](http://www.flybase.org/)). All annotated *D. melanogaster* UGT genes were found in a

1565 single MCL genes family (family\_12).

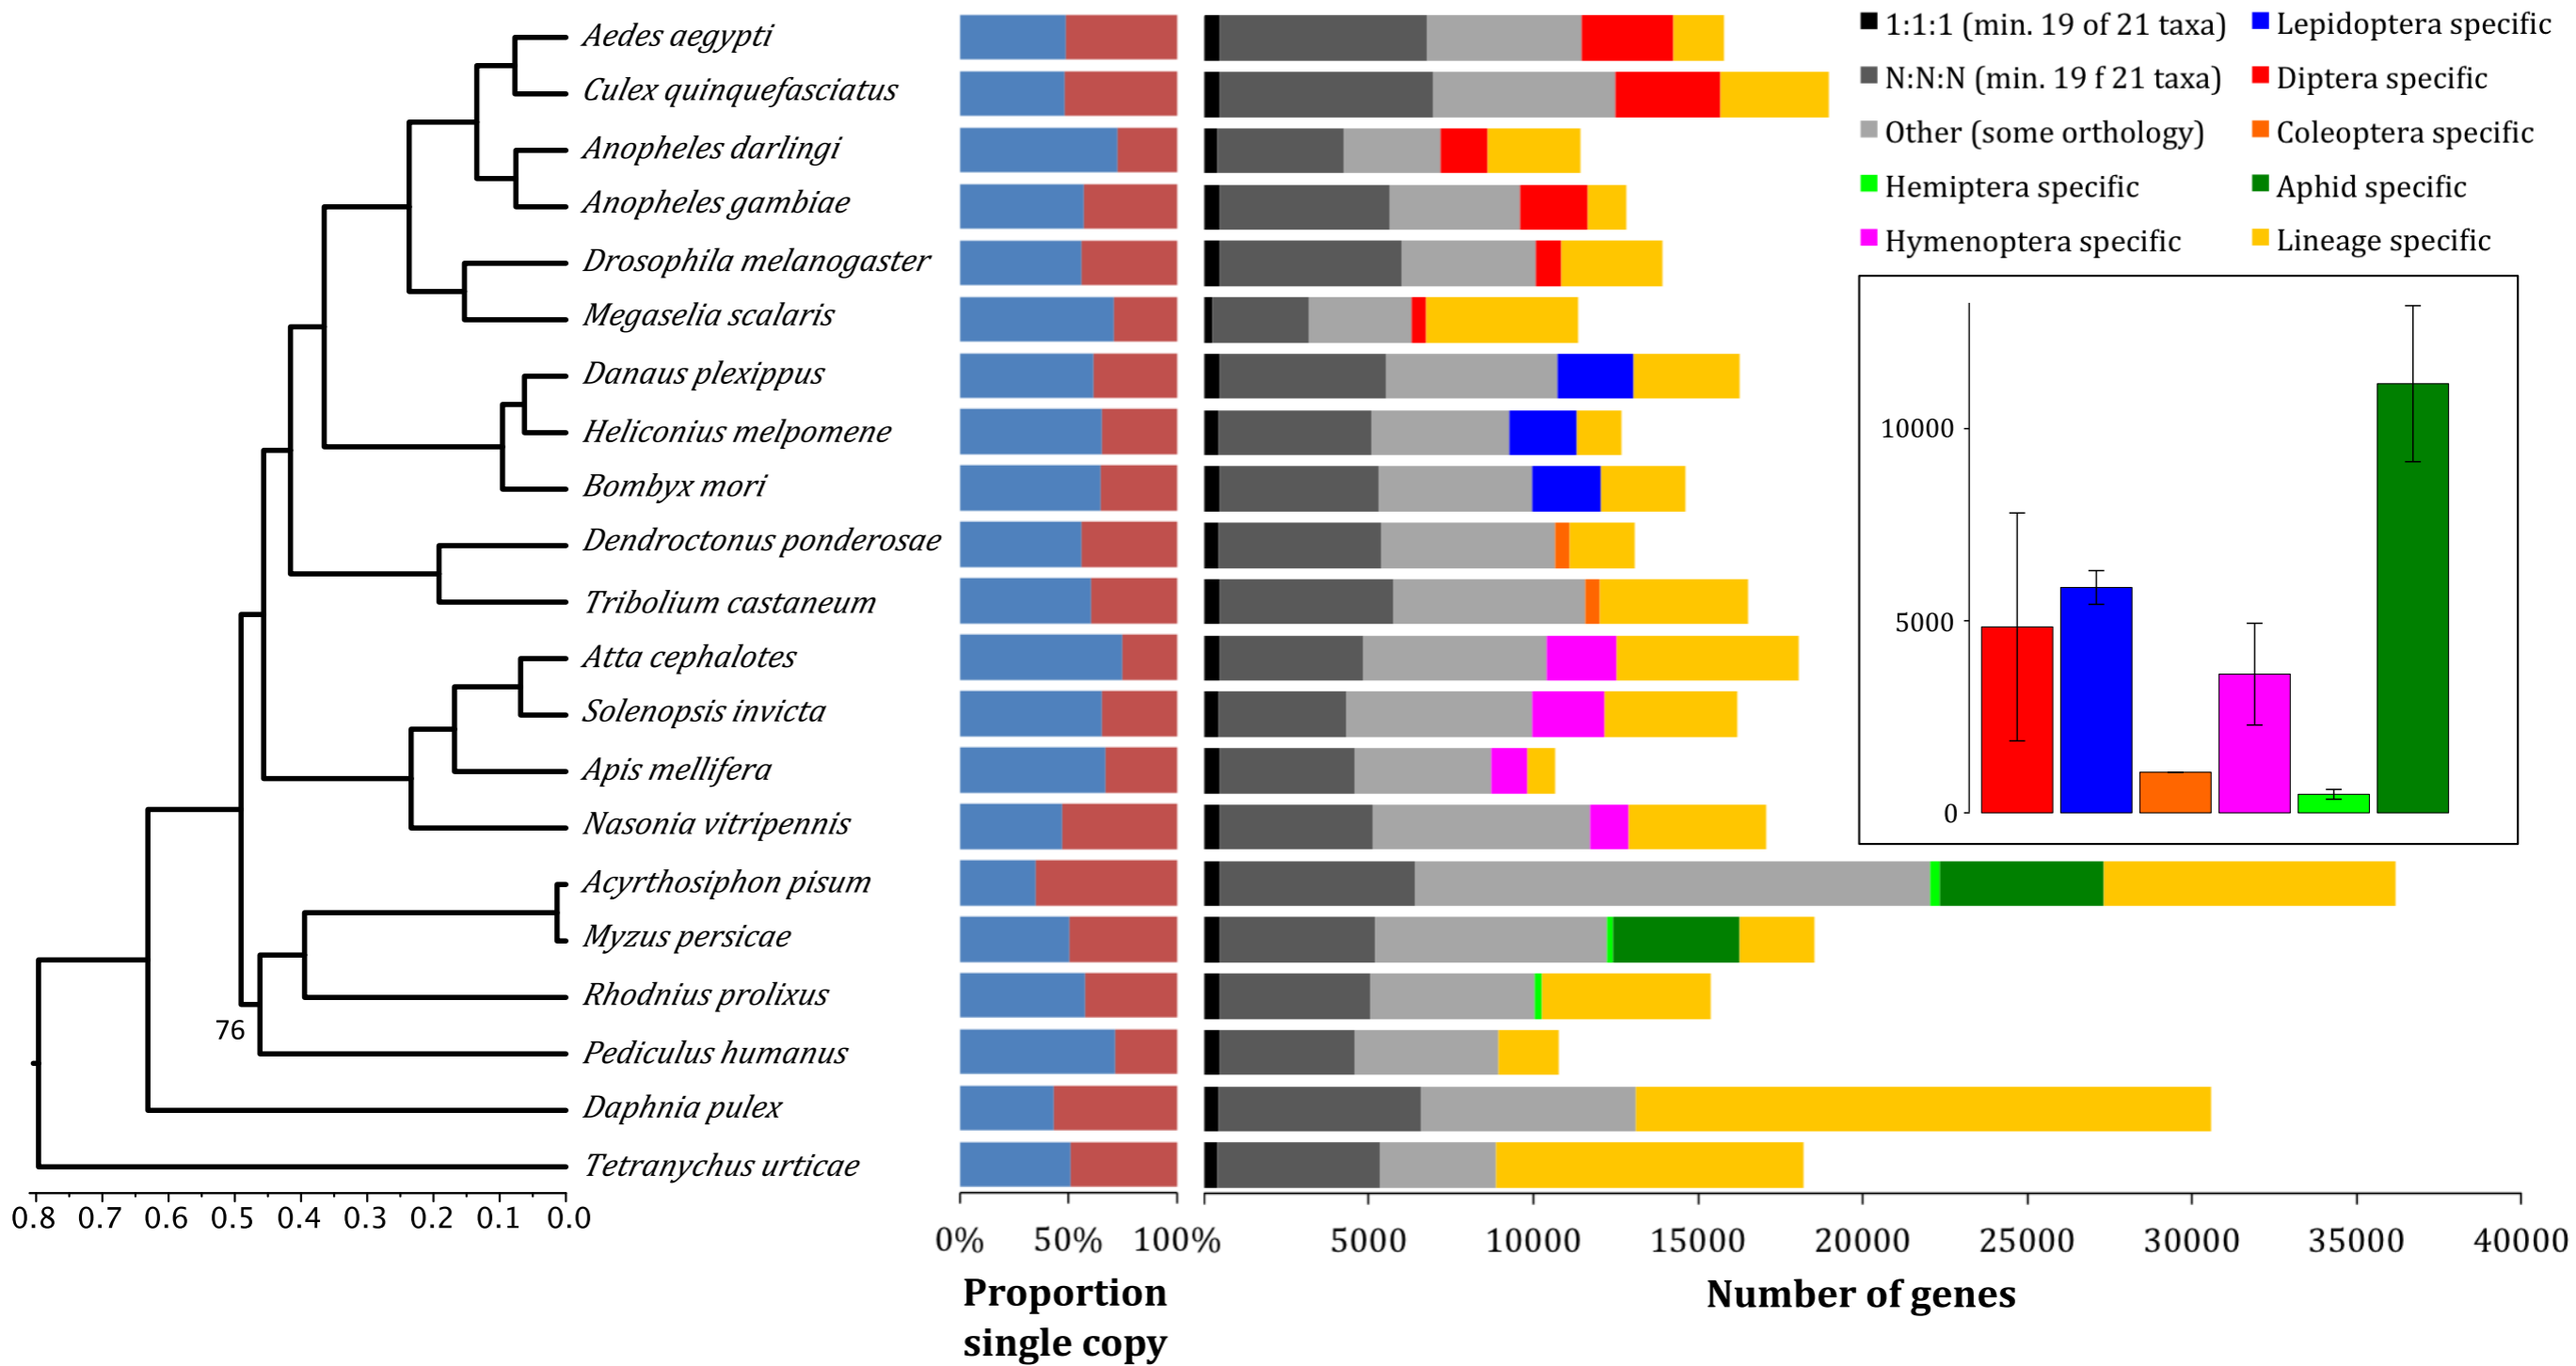

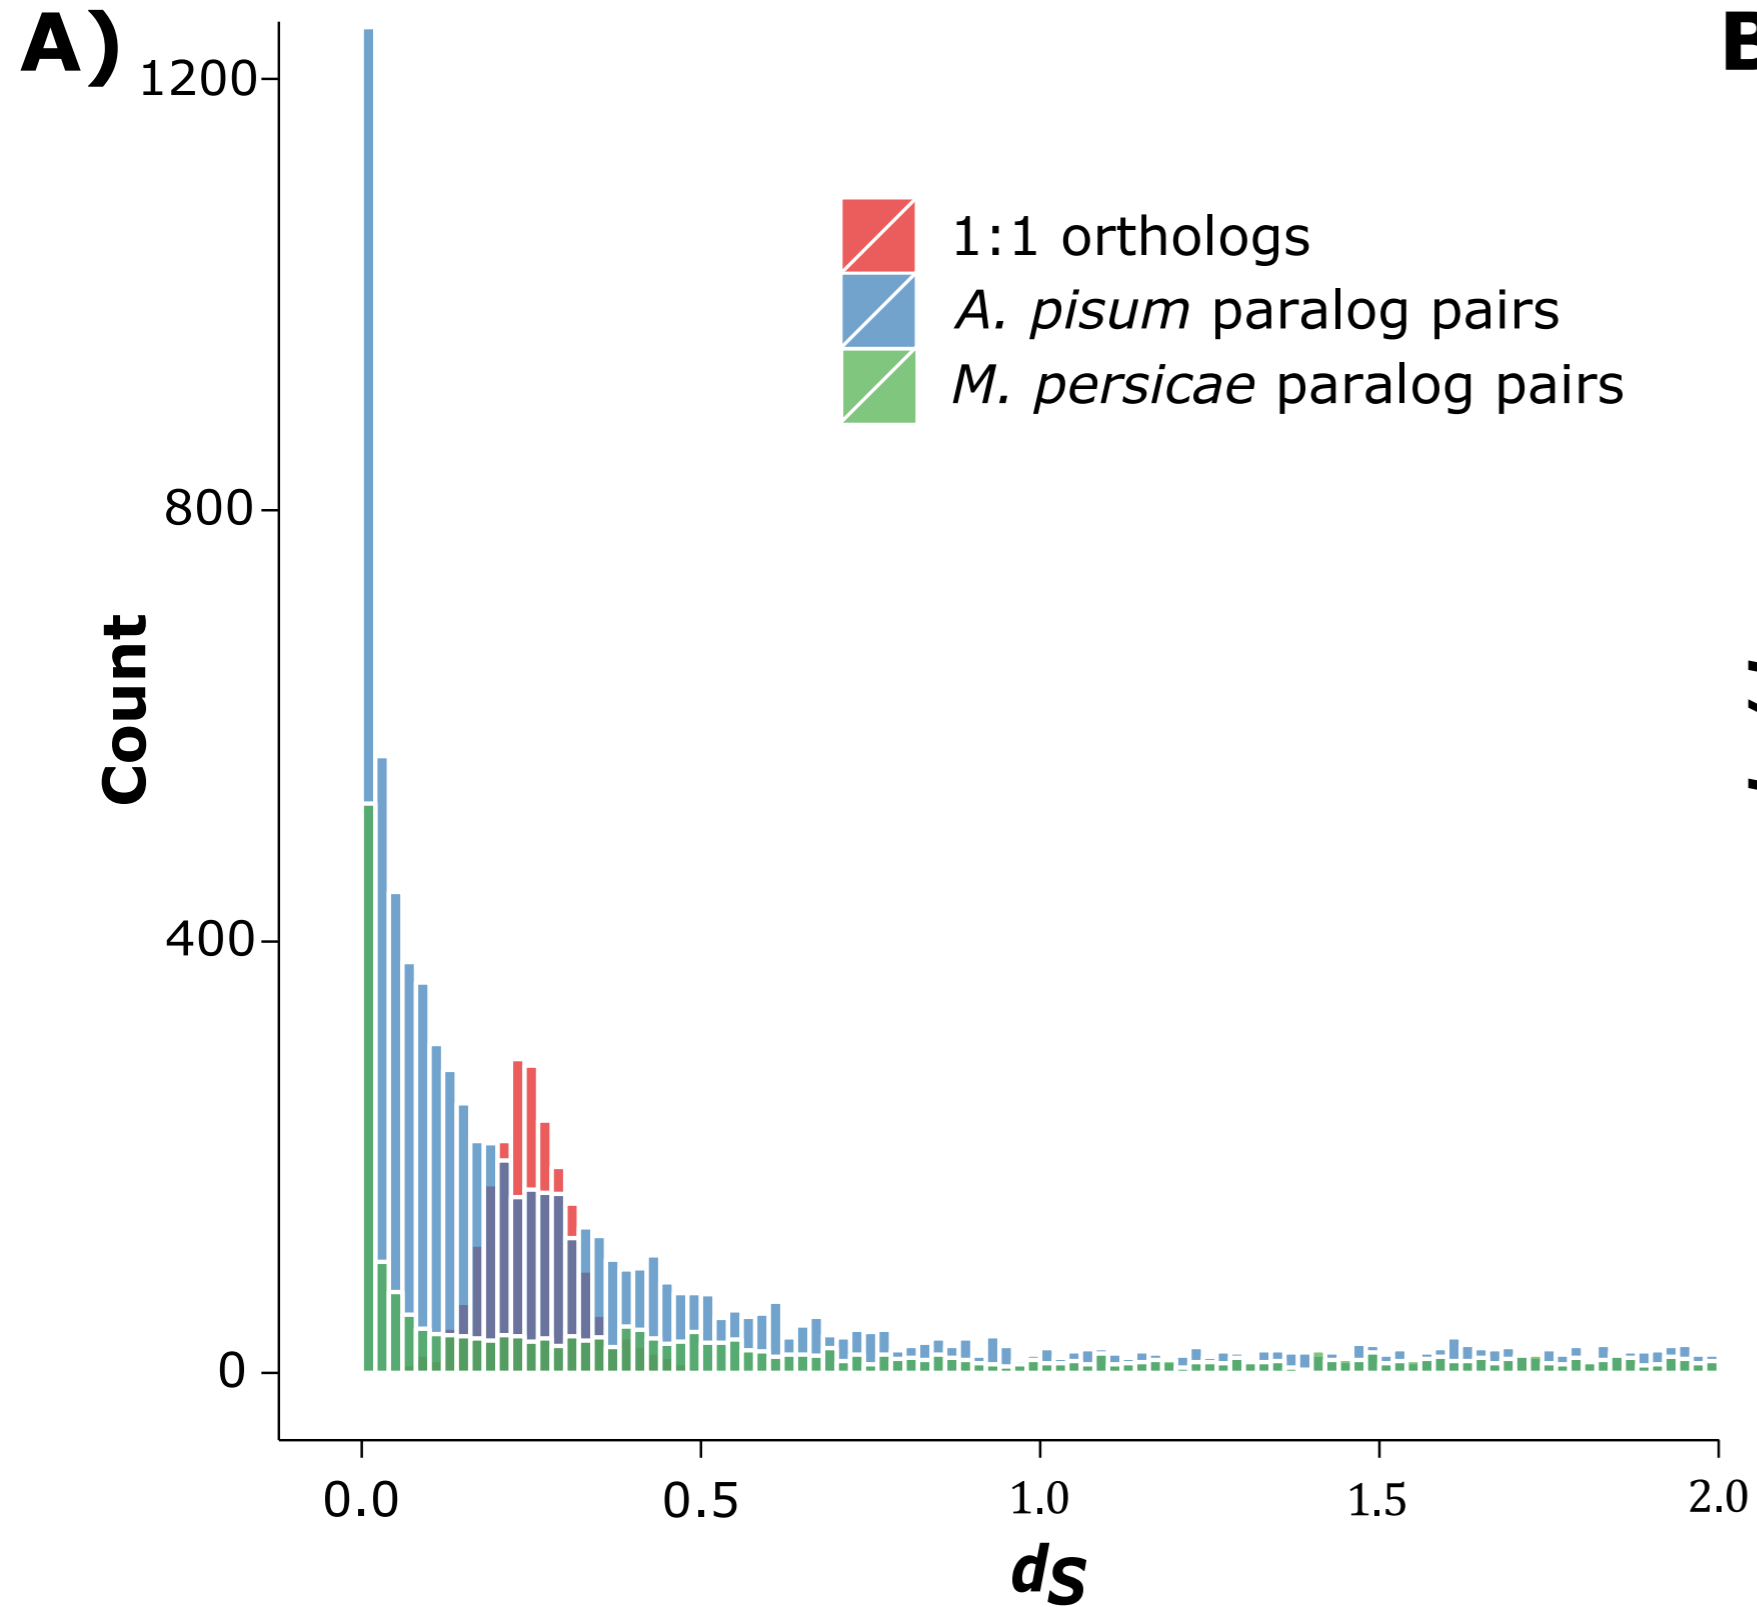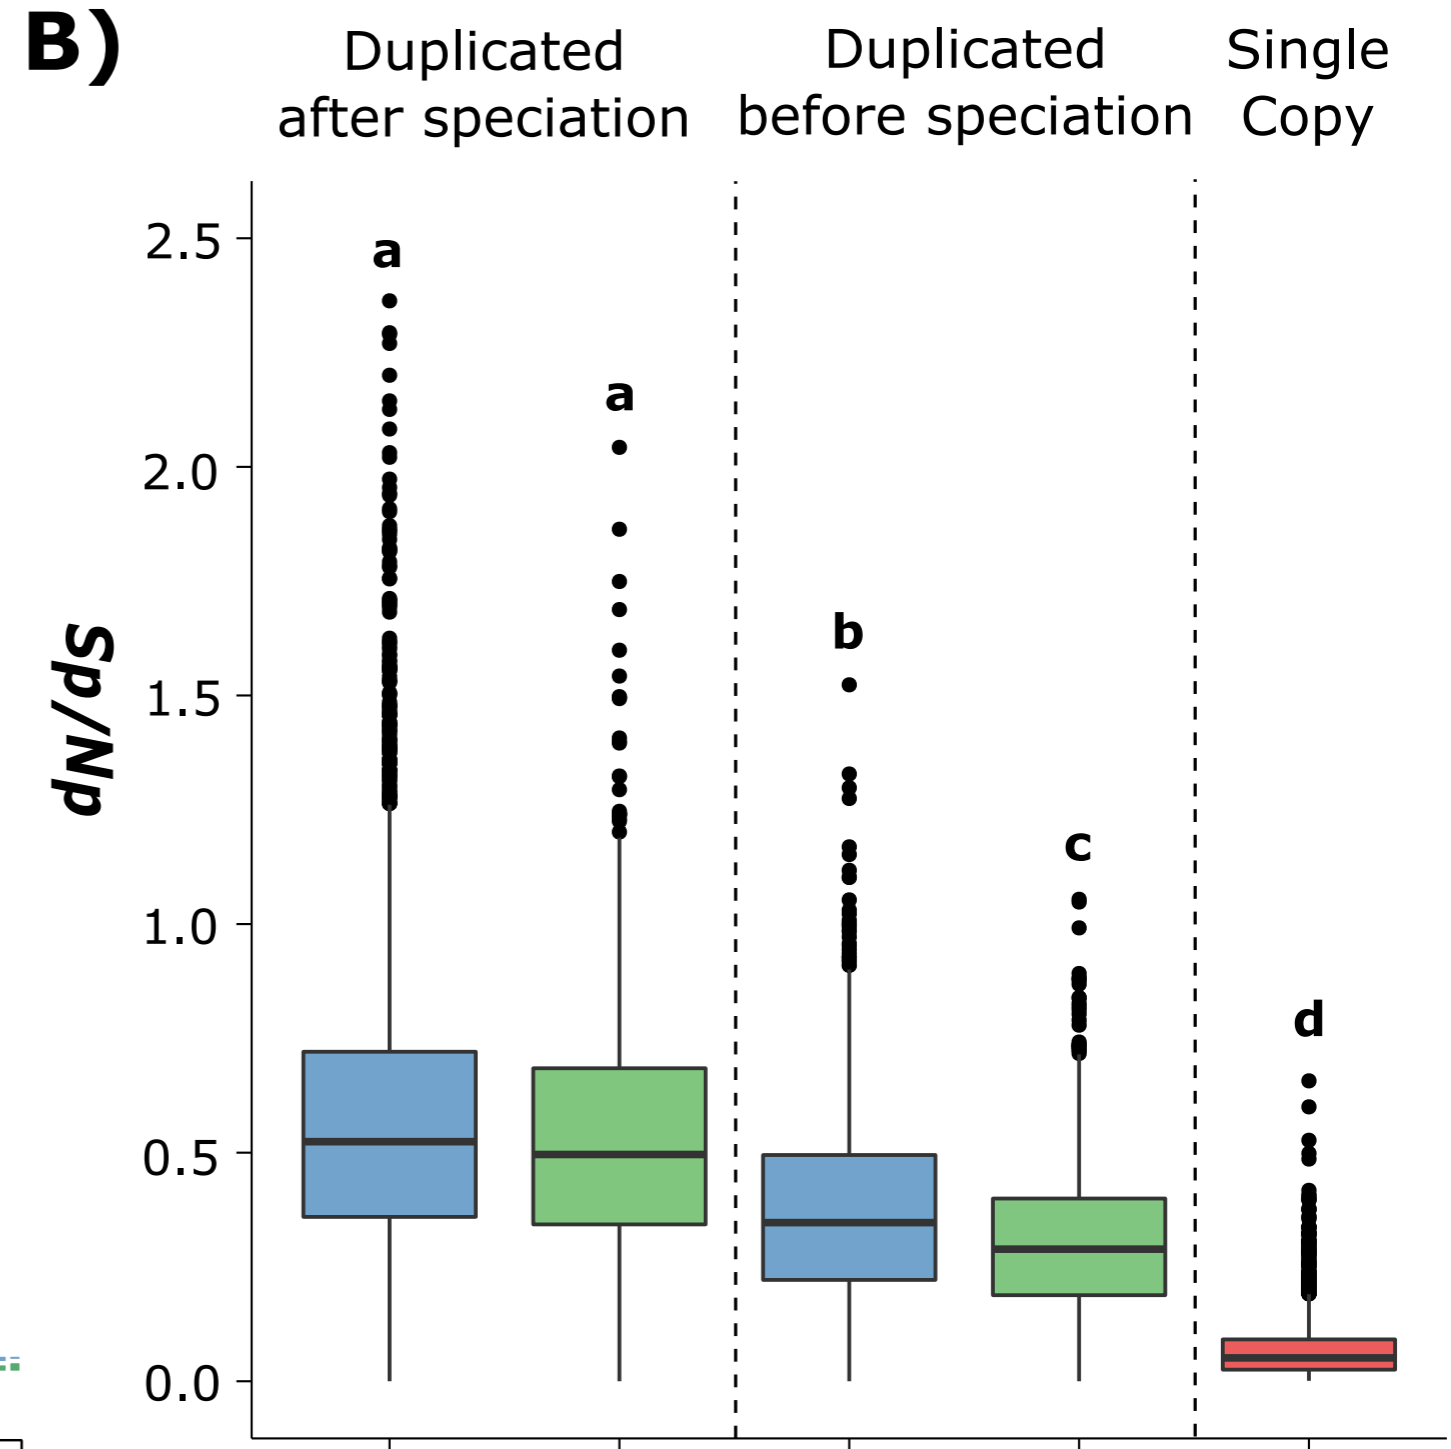

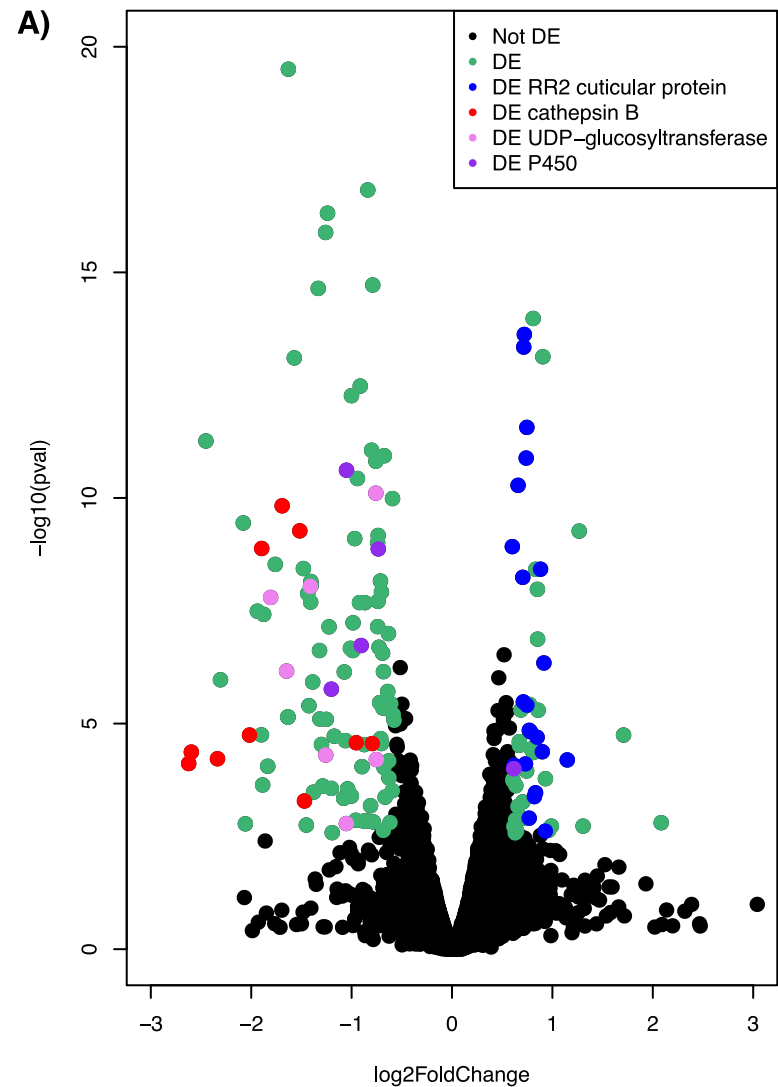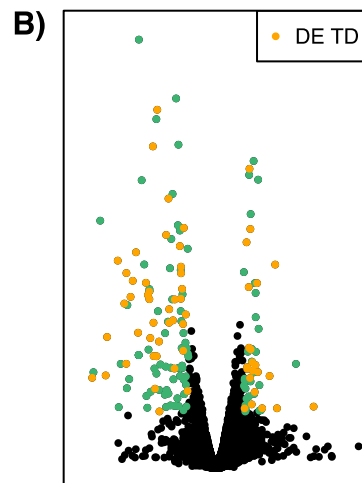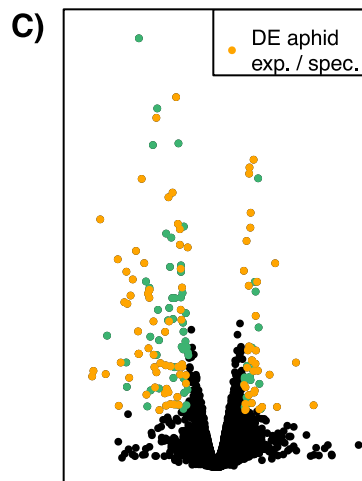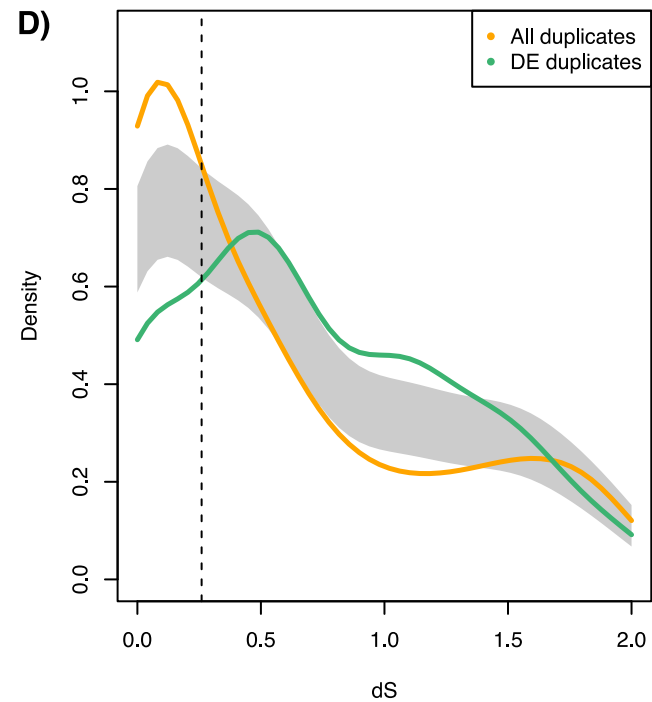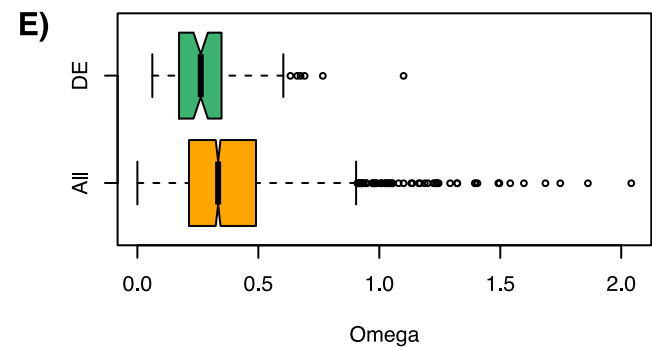



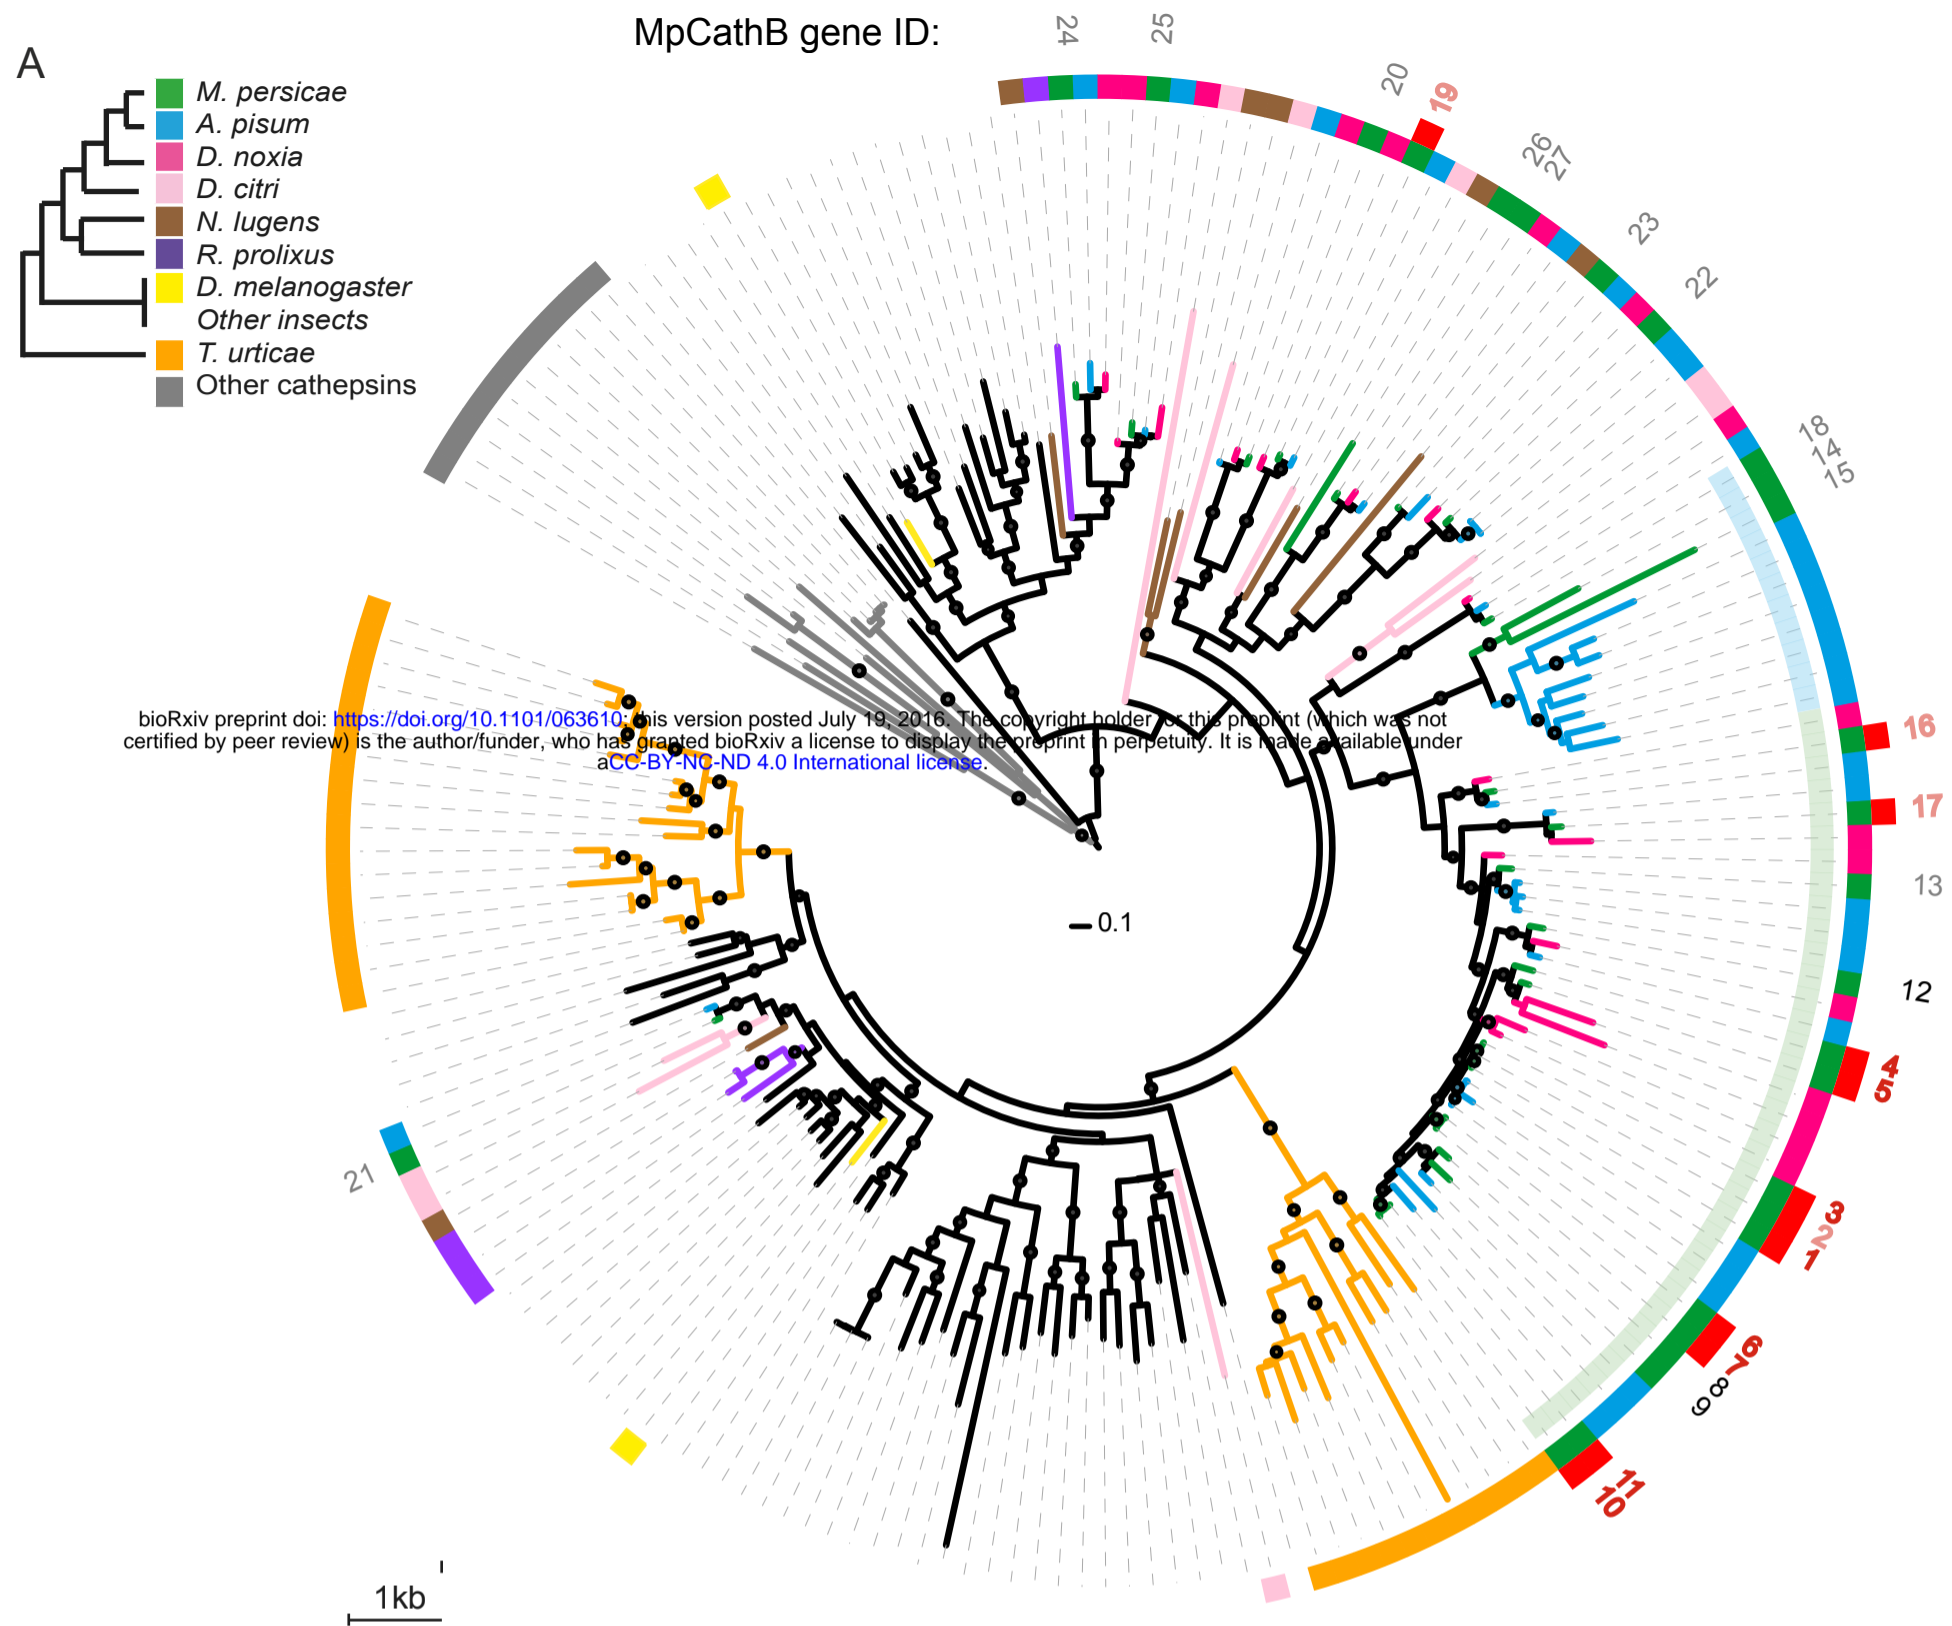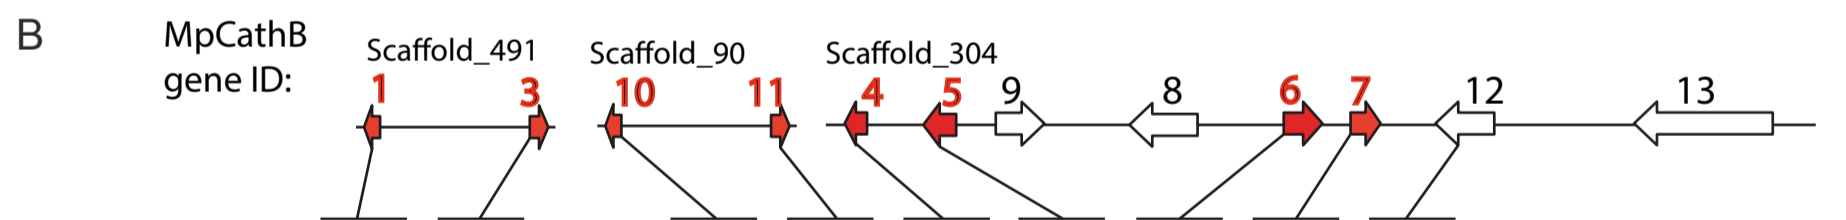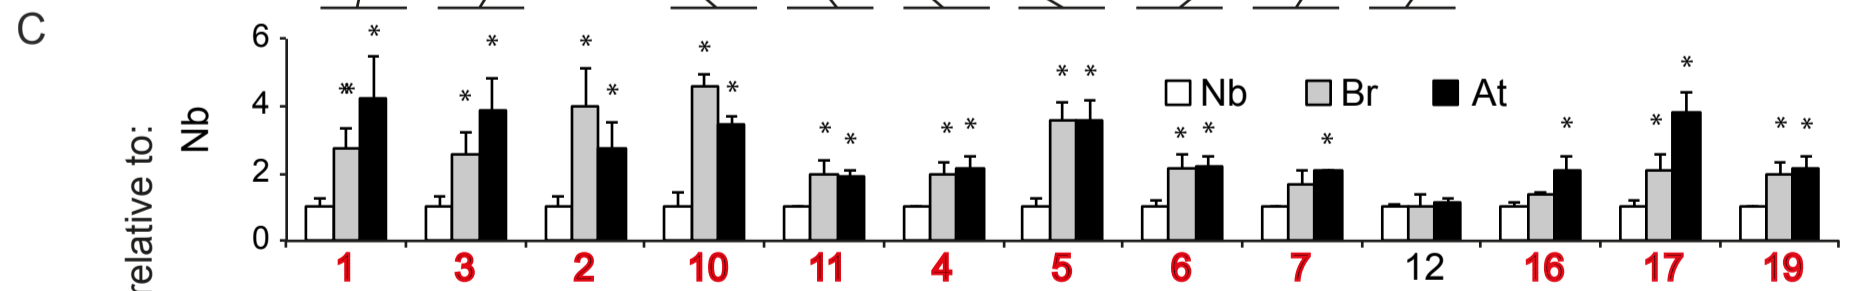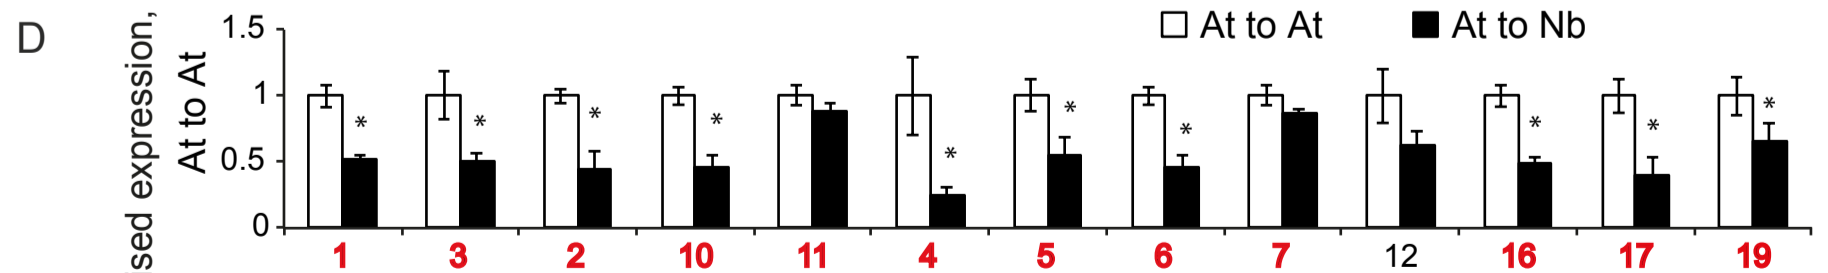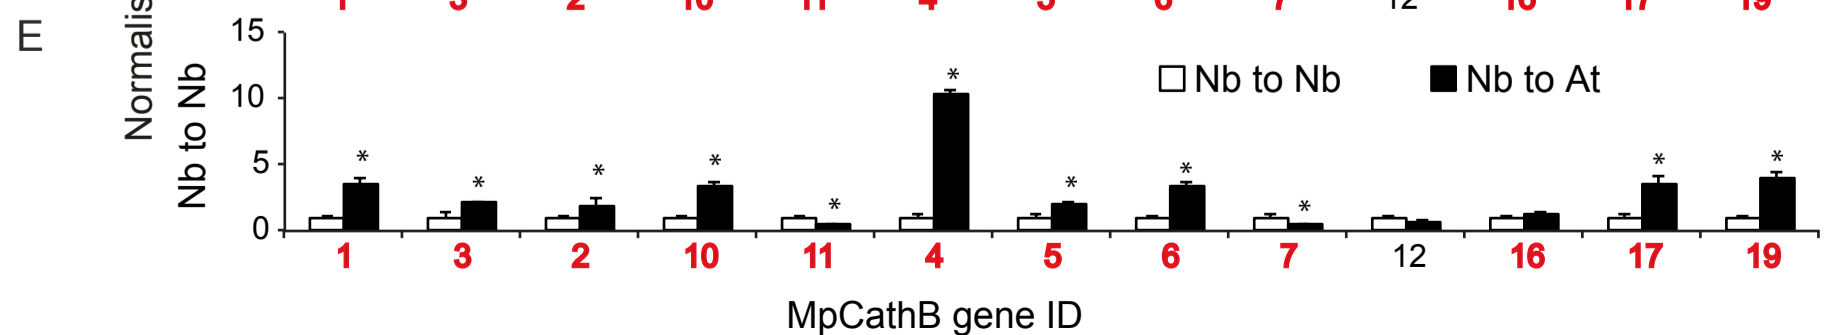

**A**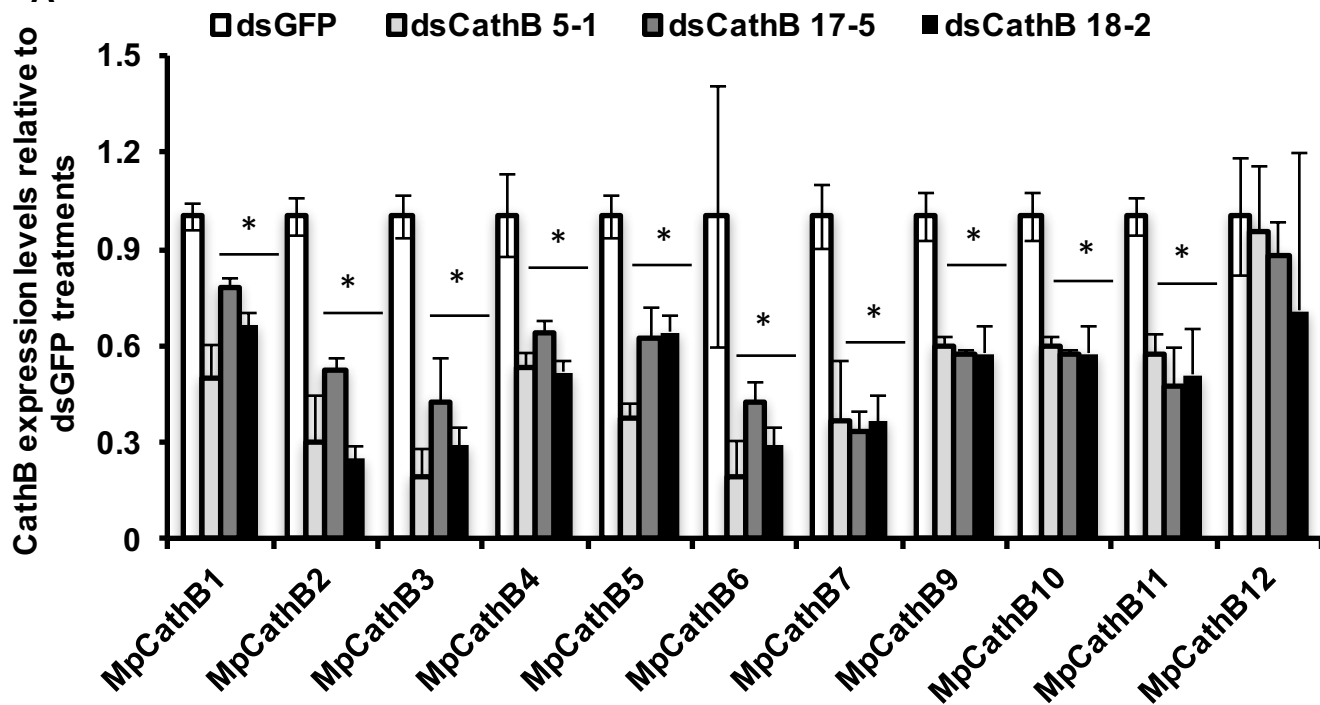**B**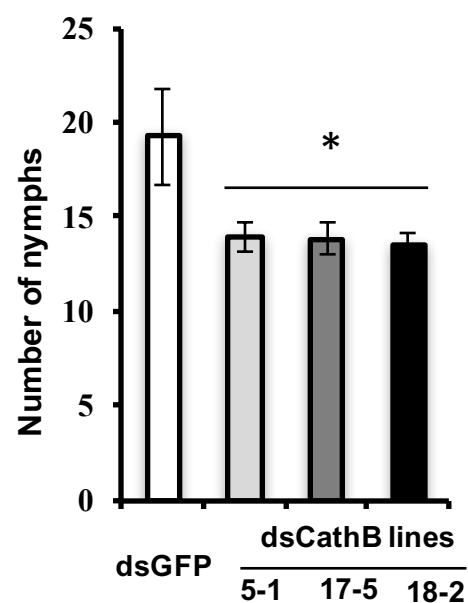**C**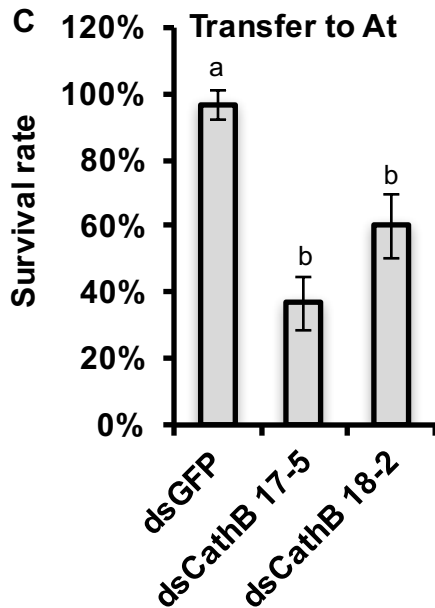**D**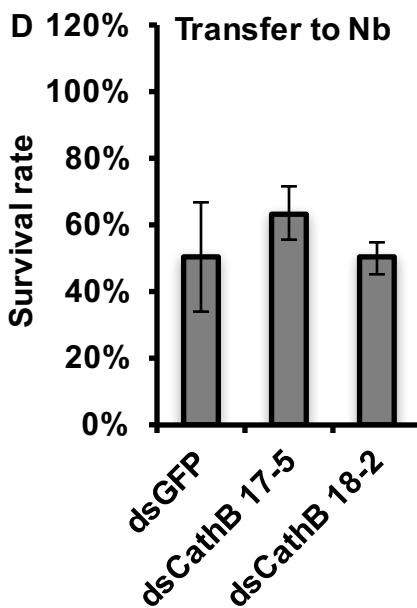**E**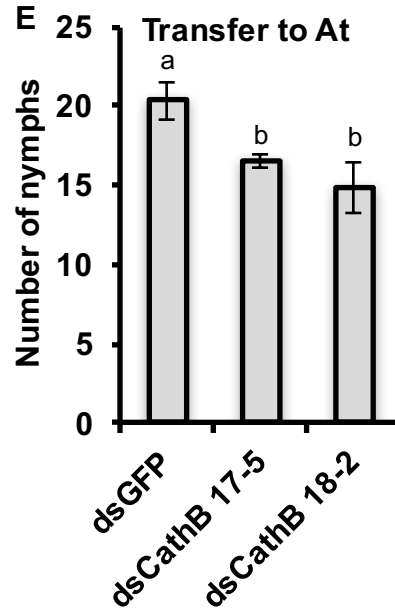**F**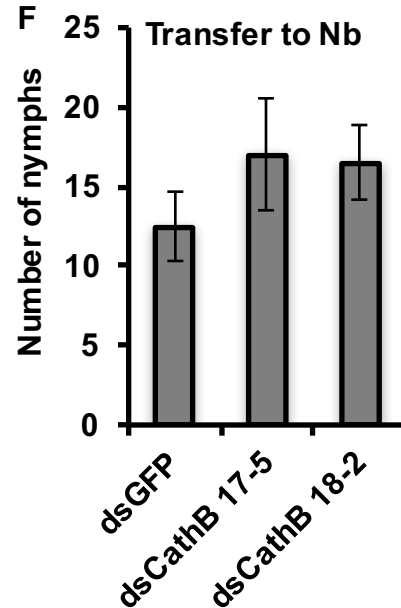

Source: https://www.biorxiv.org/content/10.1101/063610v1.full.pdf
